# Supplementary material for: Transcriptome&ensp;Analysis Identities Key Candidate Genes Mediating Purple Ovary Coloration in Asiatic Hybrid Lilies
Source: Preprints.org preprint supplement (doi:10.20944/preprints201609.0009.v1), 2016-09-05
Supplement: Supplementary file 3 [file supplementary]

## Sheet: Table S1
Table S1. Summary of transcriptome sequencing data.
Sample	Raw reads	Clean reads	Clean bases (G)	Error (%)	Q20 (%)	Q30 (%)	GC content (%)
S1-1	50379718	48756448	7.31	0.03	94.04	86.75	49.4
S1-2	54131942	52667594	7.9	0.03	94.4	87.4	49.8
S1-3	53216154	51820020	7.77	0.03	94.34	87.3	49.91
S2-1	44720244	43603420	6.54	0.02	94.93	88.11	51.37
S2-2	43422346	41975744	6.3	0.02	94.77	87.8	50.09
S2-3	57172352	55489332	8.32	0.02	95.18	88.58	50.22
Total S1	157727814	153244062	22.98
Total S2	145314942	141068496	21.16
Total	303042756	294312558

## Sheet: Table S2
Table S1. Differentially-expressed genes between S2 and S1 libraries.
gene_id	log2FoldChange	pval	padj
c122352_g2	1.0015	0.0012129	0.045066
c122569_g1	1.0018	0.00013282	0.0071172
c113963_g1	1.0018	0.00059018	0.024979
c85810_g1	1.0022	8.862e-05	0.0050471
c113622_g3	1.0025	0.00010809	0.0059764
c103177_g1	1.0028	0.00064848	0.02692
c111130_g1	1.0029	0.00056013	0.023926
c109959_g1	1.0033	0.00103	0.039549
c115781_g1	1.0039	0.00015405	0.0080709
c123940_g2	1.0044	4.1789e-05	0.0026139
c81501_g1	1.0062	0.00030732	0.014428
c119763_g4	1.0072	8.5823e-05	0.0049029
c102106_g2	1.008	0.00034797	0.01603
c119367_g2	1.008	0.0013439	0.048975
c116045_g2	1.0082	0.00011086	0.0061013
c115541_g1	1.0085	0.00011146	0.0061199
c46360_g1	1.0086	0.00013845	0.00736
c121672_g1	1.009	0.00059392	0.025104
c116254_g1	1.0092	0.00016772	0.0087019
c110834_g1	1.0096	0.00075855	0.030658
c117446_g1	1.0101	0.0010042	0.038736
c123950_g2	1.0102	0.00076328	0.030834
c117399_g1	1.0104	6.2658e-05	0.003745
c120875_g6	1.011	6.087e-05	0.0036499
c109253_g3	1.011	8.3565e-05	0.0048002
c112015_g1	1.011	0.00020466	0.010301
c107049_g1	1.0113	0.00031545	0.014743
c110923_g2	1.0115	6.128e-05	0.0036719
c115102_g4	1.0126	0.00013408	0.0071687
c124285_g1	1.0127	0.00011041	0.0060803
c105905_g2	1.0128	0.00057574	0.024442
c46077_g1	1.014	0.0010202	0.039228
c113700_g1	1.0144	0.00040929	0.018323
c113569_g1	1.0147	0.00080864	0.032302
c119711_g2	1.0162	0.00060898	0.025561
c125465_g2	1.0168	7.9116e-05	0.0045825
c117619_g1	1.0178	0.00012598	0.0067919
c125511_g1	1.02	0.00083984	0.033401
c116224_g1	1.0204	5.7434e-05	0.0034589
c124911_g1	1.0218	0.0011721	0.043892
c116401_g1	1.0229	9.6805e-05	0.0054262
c119994_g1	1.0239	6.1222e-05	0.0036697
c121983_g2	1.0259	0.0012967	0.047564
c116003_g1	1.0261	0.0012884	0.047336
c102814_g1	1.0294	0.00077744	0.031265
c118223_g2	1.0298	0.00032143	0.014972
c119931_g2	1.0317	4.2552e-05	0.0026507
c111361_g1	1.0324	5.6854e-05	0.0034289
c90592_g1	1.0334	0.00010294	0.0057201
c104490_g1	1.0349	4.0118e-05	0.0025226
c121809_g2	1.0363	0.00010557	0.0058546
c113104_g1	1.0367	3.4727e-05	0.0022205
c108456_g1	1.0369	0.0002296	0.011338
c124499_g3	1.037	3.756e-05	0.0023797
c120897_g2	1.0373	0.00010458	0.0058017
c121604_g1	1.0374	0.00085137	0.033787
c103649_g2	1.038	0.0001589	0.0082961
c117133_g1	1.0385	9.1596e-05	0.0051777
c108948_g1	1.0388	9.3099e-05	0.0052449
c124299_g2	1.0389	0.00072365	0.029483
c121871_g1	1.0391	0.00010363	0.0057543
c117354_g1	1.0398	6.4662e-05	0.003851
c117245_g2	1.0405	0.00031114	0.014562
c110808_g6	1.0415	0.00012976	0.0069757
c111822_g2	1.042	4.0953e-05	0.0025683
c111255_g1	1.0431	0.0006983	0.028632
c114854_g2	1.0445	0.0001648	0.0085825
c69054_g1	1.0449	9.8542e-05	0.005505
c116137_g3	1.0454	4.8666e-05	0.0029935
c118627_g1	1.046	0.00070096	0.028699
c84414_g1	1.0464	0.0012615	0.046545
c110715_g1	1.0474	0.00015308	0.0080327
c119032_g1	1.048	0.00034339	0.015845
c124662_g1	1.0503	0.00016159	0.0084286
c110731_g1	1.051	0.0010789	0.041096
c105917_g1	1.0533	0.00029003	0.013724
c119566_g2	1.0535	0.0003311	0.015358
c102267_g1	1.0538	0.0013265	0.048474
c105419_g2	1.0549	0.00023212	0.011441
c104024_g1	1.0572	0.00086533	0.034219
c103974_g1	1.059	4.6092e-05	0.0028489
c118092_g2	1.0597	0.00062628	0.026188
c116059_g2	1.0601	0.0004835	0.021156
c119038_g3	1.0604	0.0001014	0.0056531
c122857_g1	1.0609	0.00028191	0.013424
c77527_g2	1.0612	5.8005e-05	0.0034907
c112838_g1	1.0622	0.0011019	0.041792
c111285_g1	1.0625	0.00037448	0.017053
c120211_g2	1.0633	2.023e-05	0.0013647
c85052_g1	1.0638	0.00015032	0.0079152
c124840_g1	1.0647	0.00011248	0.0061661
c103830_g3	1.0648	0.00056416	0.024058
c125229_g2	1.0651	0.0002144	0.010709
c123378_g2	1.0659	0.00031382	0.014671
c119611_g2	1.0665	7.3323e-05	0.0042887
c81167_g1	1.0673	0.00011938	0.0064888
c120447_g2	1.0677	2.5778e-05	0.0016958
c119042_g2	1.0678	0.00025756	0.012445
c105567_g1	1.0686	2.7422e-05	0.0017961
c110275_g1	1.0708	0.00017152	0.0088724
c119065_g1	1.0711	0.00014036	0.0074449
c122303_g2	1.0717	0.00038799	0.017572
c109959_g2	1.072	6.6936e-05	0.0039708
c125022_g1	1.0729	3.0148e-05	0.0019548
c113005_g1	1.0743	5.2217e-05	0.0031849
c120482_g2	1.0745	1.8229e-05	0.0012458
c115307_g2	1.0761	0.00050372	0.02188
c126242_g2	1.0763	1.6193e-05	0.00112
c124604_g1	1.0767	0.00095132	0.037034
c114303_g1	1.0772	0.0010239	0.039361
c118247_g1	1.0784	3.018e-05	0.001956
c112205_g1	1.0791	7.7871e-05	0.0045167
c124185_g2	1.0794	0.00021168	0.01061
c116441_g2	1.0803	0.0007024	0.028736
c113383_g2	1.0818	0.00059652	0.025164
c124845_g1	1.0841	3.827e-05	0.0024164
c114430_g1	1.0847	0.0013617	0.049473
c103409_g2	1.085	4.2281e-05	0.0026375
c107018_g1	1.0852	9.3079e-05	0.0052449
c114325_g2	1.0859	3.5121e-05	0.0022379
c117067_g1	1.0862	2.7269e-05	0.0017868
c117077_g7	1.0878	0.00069807	0.02863
c115793_g1	1.0893	0.00066713	0.02753
c109814_g1	1.0896	0.00012422	0.0067145
c112032_g1	1.0902	0.00025605	0.012385
c114957_g1	1.0917	6.7352e-05	0.0039912
c113341_g2	1.0934	4.0652e-05	0.0025531
c119961_g1	1.0934	0.00030445	0.014309
c125912_g1	1.0944	1.3876e-05	0.00097554
c112900_g2	1.0946	0.00069648	0.028572
c115175_g1	1.0963	7.7377e-05	0.0044943
c104869_g1	1.0969	1.9493e-05	0.001323
c105796_g4	1.0982	5.9369e-05	0.0035677
c124748_g5	1.0983	2.0215e-05	0.0013642
c75962_g2	1.0985	0.00010156	0.0056566
c117271_g2	1.0989	0.00037829	0.017184
c117221_g1	1.0991	0.0001124	0.0061654
c100702_g1	1.0997	2.1011e-05	0.0014128
c101197_g2	1.1008	4.7978e-05	0.0029588
c118615_g1	1.1031	1.6263e-05	0.0011239
c124667_g3	1.1043	5.5528e-05	0.0033611
c122670_g3	1.1049	0.00099123	0.038351
c111950_g1	1.107	0.00019676	0.0099518
c117006_g1	1.1071	0.00027243	0.01304
c57210_g1	1.1084	0.00013692	0.0072902
c115336_g1	1.1098	3.3572e-05	0.0021516
c117889_g2	1.11	2.8539e-05	0.0018612
c109958_g1	1.1109	1.7106e-05	0.0011787
c103749_g1	1.1142	1.3954e-05	0.00098019
c104586_g1	1.1142	2.1469e-05	0.0014396
c112203_g4	1.1143	2.7542e-05	0.0018025
c119818_g2	1.1161	4.5499e-05	0.0028145
c114673_g1	1.1179	1.2142e-05	0.00086564
c96982_g1	1.1181	0.00061194	0.025672
c102144_g1	1.119	2.3665e-05	0.0015729
c109802_g1	1.1195	0.0003389	0.015674
c116835_g1	1.1196	1.2862e-05	0.00091001
c117793_g4	1.1196	7.5936e-05	0.004426
c74963_g1	1.1216	0.00082017	0.032696
c119679_g7	1.1229	0.00021448	0.010709
c124348_g1	1.1229	0.00025204	0.012219
c72357_g2	1.1231	0.00046758	0.020535
c125399_g2	1.1244	0.00082006	0.032696
c119444_g3	1.1247	9.7185e-06	0.00070986
c117214_g4	1.1259	0.00053186	0.022912
c124568_g2	1.1267	2.0487e-05	0.0013809
c115355_g2	1.1268	7.7033e-06	0.00057864
c102795_g1	1.1268	5.1147e-05	0.0031265
c120965_g2	1.1271	0.00071104	0.02904
c117862_g1	1.1275	2.1065e-05	0.0014153
c116366_g1	1.1282	6.472e-05	0.0038517
c92219_g1	1.1285	7.4472e-05	0.0043499
c101414_g1	1.1287	0.0010901	0.041397
c117863_g2	1.1294	0.00104	0.039832
c120706_g1	1.1296	0.00011134	0.0061153
c101910_g1	1.1297	0.00025363	0.012281
c111690_g1	1.1299	3.7857e-05	0.0023939
c124779_g2	1.131	8.3516e-05	0.0047991
c103107_g1	1.1313	0.00069483	0.028511
c109386_g5	1.132	0.00077846	0.031265
c124944_g1	1.1328	0.00018319	0.0093911
c106777_g2	1.1336	0.0002391	0.011713
c125491_g1	1.1346	9.0786e-05	0.0051441
c109140_g1	1.1356	4.7321e-05	0.0029205
c104792_g1	1.1358	0.0010196	0.039212
c122323_g1	1.1361	7.274e-05	0.0042636
c104568_g1	1.1362	0.00080545	0.032202
c110596_g2	1.1365	7.0174e-06	0.00053239
c115684_g1	1.1367	0.00024105	0.011795
c250027_g1	1.1368	0.001301	0.047692
c106804_g2	1.1373	1.1494e-05	0.00082513
c115185_g3	1.1384	2.5254e-05	0.0016685
c89925_g1	1.1384	0.00060833	0.02554
c123174_g2	1.1393	0.001282	0.04716
c116088_g2	1.1398	0.00032684	0.015195
c106495_g1	1.1428	2.5428e-05	0.001676
c114090_g1	1.1448	1.2269e-05	0.00087281
c105683_g1	1.1451	0.0001072	0.0059332
c107268_g1	1.1463	0.00040022	0.017979
c102407_g1	1.1479	3.3652e-05	0.0021558
c100432_g1	1.1479	4.3296e-05	0.002689
c121059_g6	1.1482	8.6519e-06	0.00064123
c111891_g2	1.1492	1.8183e-05	0.0012437
c108170_g1	1.15	2.6185e-05	0.0017211
c102731_g1	1.1505	0.00038654	0.017525
c112068_g1	1.1511	1.1105e-05	0.0007996
c101235_g1	1.1511	0.00084758	0.033684
c44171_g1	1.1518	0.0010413	0.039834
c116700_g1	1.1519	0.00012046	0.0065368
c111159_g2	1.1522	0.000506	0.021951
c122773_g5	1.1537	0.00010167	0.0056589
c113783_g1	1.1538	0.0010412	0.039834
c104801_g1	1.1577	0.00094461	0.036812
c102651_g2	1.1578	3.9327e-05	0.0024776
c122497_g1	1.1582	0.0011971	0.044619
c114897_g1	1.1608	9.2474e-05	0.0052155
c116643_g1	1.1616	3.8978e-06	0.00031522
c118332_g1	1.1623	0.00090901	0.035647
c70215_g1	1.1627	0.00016685	0.0086649
c117920_g1	1.1643	2.1702e-05	0.0014534
c117162_g1	1.1656	0.00012092	0.0065575
c85174_g1	1.1665	0.00013381	0.0071587
c104340_g1	1.1678	0.00013919	0.0073918
c121315_g2	1.1683	1.8695e-05	0.0012751
c121171_g1	1.1703	5.6309e-05	0.0034009
c110644_g5	1.1717	1.6929e-05	0.0011675
c82497_g1	1.174	0.00013459	0.0071867
c62885_g1	1.1741	1.7906e-05	0.0012263
c125778_g1	1.1749	1.061e-05	0.00076726
c107642_g1	1.175	7.2208e-06	0.00054534
c115806_g7	1.1769	8.9943e-05	0.005108
c113512_g2	1.1771	0.0002888	0.013678
c114043_g3	1.1773	5.9262e-06	0.00045943
c109245_g4	1.1809	5.4301e-06	0.00042416
c108394_g1	1.1811	9.0579e-05	0.0051359
c120689_g3	1.1814	0.00051045	0.022138
c102062_g1	1.1818	0.0009675	0.037511
c123882_g4	1.1822	6.9584e-06	0.00052888
c108530_g1	1.1822	9.6753e-06	0.00070733
c118278_g1	1.183	5.6964e-06	0.00044306
c118631_g3	1.1838	5.4305e-06	0.00042416
c110575_g2	1.1839	0.00014753	0.0077827
c117539_g1	1.185	5.518e-06	0.00043039
c107591_g1	1.1874	6.0127e-06	0.00046448
c113998_g2	1.188	3.1539e-05	0.0020377
c119562_g2	1.1885	4.879e-06	0.00038578
c86460_g1	1.1893	3.7741e-06	0.000307
c107093_g1	1.1901	1.0979e-05	0.00079082
c98408_g1	1.1903	7.5902e-06	0.00057169
c112883_g2	1.1911	0.0011994	0.044673
c122873_g1	1.1921	2.3635e-05	0.0015715
c107433_g1	1.1922	1.2215e-05	0.00087011
c87034_g1	1.1925	0.0002458	0.011968
c124536_g2	1.1925	0.00060986	0.025591
c108379_g1	1.1927	6.3464e-05	0.0037878
c115506_g2	1.1927	0.00020216	0.010188
c123189_g1	1.1928	2.2059e-06	0.00018952
c101079_g1	1.1935	1.6122e-05	0.0011156
c200642_g1	1.1948	7.9923e-06	0.00059819
c124325_g5	1.1955	3.3512e-05	0.0021494
c107105_g1	1.1961	9.1018e-05	0.0051555
c50248_g1	1.1966	1.8211e-05	0.0012451
c119046_g1	1.1981	6.8606e-05	0.0040498
c94473_g1	1.2005	1.2506e-05	0.00088779
c123616_g1	1.2008	3.8662e-06	0.00031342
c58863_g1	1.2029	4.9487e-06	0.00039073
c117184_g1	1.2034	1.7726e-05	0.0012155
c96862_g1	1.2035	0.00019254	0.0097801
c103899_g1	1.2056	0.00042997	0.01909
c126418_g4	1.2076	1.984e-05	0.0013432
c117288_g1	1.2084	1.4488e-05	0.001013
c120552_g4	1.2088	2.6446e-06	0.00022284
c105171_g1	1.2098	2.063e-05	0.0013894
c125121_g2	1.2109	0.00024903	0.012104
c104562_g1	1.2121	0.00014285	0.0075628
c115365_g1	1.2139	4.327e-05	0.0026884
c104244_g2	1.2151	0.00024194	0.011821
c47872_g2	1.2153	0.00013496	0.0071987
c123776_g1	1.2155	0.00033009	0.015316
c78417_g1	1.216	0.0003661	0.016721
c117369_g1	1.2163	3.0624e-06	0.00025407
c112593_g1	1.217	2.5006e-06	0.000212
c122109_g5	1.2175	6.9636e-05	0.0041047
c119539_g1	1.2182	9.2482e-05	0.0052155
c125984_g1	1.2186	1.4324e-06	0.00012849
c86420_g1	1.2195	6.3448e-06	0.00048758
c117440_g2	1.2201	5.698e-05	0.0034352
c105368_g1	1.2207	0.00046189	0.020328
c120151_g1	1.2232	1.1572e-06	0.00010591
c115603_g1	1.2233	0.00020217	0.010188
c122265_g2	1.2247	2.309e-05	0.0015383
c108273_g1	1.2249	1.9158e-06	0.00016657
c126242_g1	1.226	0.00010829	0.0059822
c99488_g1	1.2272	2.4102e-06	0.00020495
c114655_g1	1.228	0.00011711	0.0063841
c119659_g1	1.2283	2.1764e-06	0.00018736
c111170_g1	1.2286	2.3452e-05	0.0015606
c120590_g1	1.2294	1.8436e-06	0.00016062
c111930_g2	1.2299	1.1676e-05	0.00083676
c107096_g1	1.2308	7.4461e-06	0.00056109
c111952_g2	1.2312	0.000585	0.024785
c113300_g2	1.233	4.7196e-06	0.00037442
c121731_g3	1.2334	0.0011628	0.043612
c125647_g2	1.2351	4.6275e-06	0.00036764
c125182_g1	1.2361	0.00011572	0.0063163
c121177_g2	1.2365	1.4529e-06	0.00012984
c106247_g1	1.2397	2.1958e-06	0.00018874
c103507_g1	1.2405	2.3083e-05	0.0015383
c102448_g1	1.2414	0.0003685	0.016808
c124676_g7	1.242	1.7861e-06	0.00015594
c101534_g1	1.2425	0.00027528	0.013153
c87996_g1	1.2431	9.8011e-07	9.1564e-05
c114749_g1	1.2434	6.3001e-05	0.0037628
c109686_g1	1.2434	0.00015772	0.0082368
c125188_g2	1.2434	0.000652	0.027019
c107685_g1	1.2442	3.5409e-06	0.00029015
c106794_g1	1.2443	0.00010159	0.0056566
c120829_g1	1.245	5.0772e-05	0.0031093
c121586_g3	1.2453	8.414e-06	0.0006261
c101138_g1	1.2457	7.8763e-06	0.00059004
c116801_g1	1.2467	4.0393e-06	0.00032493
c104774_g1	1.2469	0.0004873	0.021287
c114258_g2	1.247	0.0010024	0.038678
c113076_g1	1.2479	3.3122e-06	0.00027303
c120471_g2	1.2488	1.2145e-06	0.00011055
c84649_g1	1.2499	1.0603e-05	0.00076705
c126133_g1	1.2511	7.0116e-06	0.00053219
c106861_g1	1.2515	0.00060359	0.025379
c123925_g1	1.252	0.0009557	0.037149
c100536_g1	1.2538	0.00013447	0.0071827
c122096_g4	1.2587	5.4469e-06	0.00042524
c103663_g1	1.2605	1.1752e-06	0.00010733
c117074_g1	1.2606	1.5765e-06	0.00013984
c111244_g1	1.2611	1.5206e-06	0.00013548
c120577_g2	1.2617	4.7019e-06	0.00037319
c73573_g3	1.2629	0.00017007	0.0088157
c124839_g3	1.2631	0.00028635	0.013589
c121029_g1	1.2634	1.3514e-06	0.00012196
c96702_g1	1.264	2.4696e-06	0.00020961
c124739_g1	1.2646	2.3304e-06	0.00019899
c123405_g1	1.2646	7.5901e-05	0.0044255
c102653_g1	1.2648	2.7103e-05	0.0017766
c110892_g1	1.2667	0.00027011	0.012951
c114342_g1	1.2669	1.144e-05	0.00082157
c125182_g3	1.2704	0.00019499	0.0098745
c121869_g2	1.2706	0.0001094	0.0060329
c114045_g2	1.2714	3.3002e-05	0.0021207
c100293_g1	1.2716	1.0532e-06	9.7625e-05
c117585_g2	1.2724	7.9352e-05	0.0045898
c122556_g1	1.2739	5.5658e-07	5.492e-05
c94052_g1	1.2748	0.00024188	0.011821
c117898_g1	1.2757	2.2575e-05	0.001507
c108819_g1	1.276	9.4443e-06	0.00069318
c126063_g1	1.2797	2.504e-06	0.00021217
c115679_g4	1.2805	4.5322e-05	0.0028065
c115244_g2	1.2819	8.4496e-06	0.00062791
c108015_g1	1.2832	1.1002e-06	0.00010119
c124516_g4	1.2838	7.0594e-07	6.8008e-05
c123907_g1	1.2839	1.4197e-06	0.00012763
c124827_g7	1.2844	7.2766e-07	6.9858e-05
c117348_g1	1.2844	8.0904e-07	7.6917e-05
c62322_g1	1.2845	3.062e-07	3.2195e-05
c112212_g3	1.285	2.7672e-07	2.9298e-05
c111932_g1	1.285	4.2073e-07	4.2677e-05
c109245_g3	1.2851	0.00067443	0.027783
c118570_g3	1.2853	1.1993e-06	0.00010934
c103767_g1	1.2866	4.8573e-05	0.0029889
c120743_g2	1.2875	9.778e-07	9.1399e-05
c111230_g1	1.2879	2.3914e-06	0.00020368
c125603_g3	1.288	1.6045e-05	0.0011111
c47391_g2	1.2893	0.00036169	0.016566
c115682_g6	1.2911	1.2493e-06	0.00011341
c113739_g1	1.2913	0.00029736	0.014004
c116680_g1	1.2949	2.9022e-07	3.065e-05
c114378_g1	1.2954	2.9849e-05	0.0019391
c111318_g1	1.2957	1.0822e-06	9.9814e-05
c111915_g1	1.2964	6.863e-05	0.0040498
c116821_g10	1.2969	2.0248e-05	0.0013653
c91546_g1	1.2978	0.00063787	0.026599
c116753_g1	1.2986	5.0836e-06	0.00040044
c103831_g2	1.2986	1.3292e-05	0.00093798
c98739_g1	1.299	2.1481e-06	0.00018512
c94442_g1	1.2994	0.00027858	0.013287
c109179_g1	1.2996	0.00011991	0.0065132
c118792_g1	1.3001	5.4684e-06	0.00042672
c121555_g3	1.3013	4.5939e-07	4.6149e-05
c114762_g7	1.3014	0.00073539	0.029844
c58896_g1	1.3017	8.5248e-07	8.0817e-05
c126337_g2	1.3021	3.9923e-06	0.00032174
c116139_g1	1.3033	8.6029e-06	0.00063788
c111145_g1	1.3041	1.8054e-06	0.00015754
c112496_g1	1.3043	3.6921e-07	3.7935e-05
c108476_g2	1.3065	2.5319e-05	0.0016714
c112827_g4	1.3072	0.000499	0.021721
c124943_g3	1.3075	1.2368e-06	0.0001124
c117602_g1	1.3094	1.8799e-07	2.0423e-05
c125237_g6	1.3096	1.9999e-05	0.0013513
c116921_g3	1.3096	4.0343e-05	0.0025358
c115440_g1	1.3105	0.00016576	0.0086166
c109114_g1	1.3108	1.0433e-06	9.6924e-05
c112522_g1	1.3116	5.4847e-05	0.0033259
c52153_g1	1.3119	3.5192e-05	0.0022416
c87119_g1	1.312	9.0525e-05	0.0051346
c124217_g4	1.3143	2.1079e-07	2.2766e-05
c77322_g1	1.3155	1.0195e-05	0.00074144
c123700_g1	1.3156	0.00020099	0.010139
c115092_g1	1.3164	0.00064713	0.026912
c111750_g1	1.3168	2.6355e-07	2.8028e-05
c105579_g1	1.3177	3.0772e-05	0.0019913
c114734_g2	1.3187	2.2057e-07	2.3745e-05
c61707_g1	1.3189	9.0954e-07	8.5593e-05
c116642_g1	1.319	6.4789e-06	0.00049719
c121769_g1	1.3193	1.3817e-07	1.5453e-05
c110674_g2	1.3201	0.0011187	0.042339
c109049_g1	1.3213	1.6147e-06	0.0001427
c105209_g1	1.3216	0.00038781	0.017569
c113484_g1	1.322	0.00024376	0.011875
c124661_g4	1.3236	2.4005e-06	0.00020423
c121509_g4	1.3239	1.4271e-06	0.00012812
c104610_g2	1.3245	9.1564e-05	0.0051777
c124139_g1	1.3247	0.00012545	0.00677
c121488_g1	1.3256	4.345e-06	0.00034718
c112766_g3	1.3264	1.5275e-06	0.00013593
c103764_g1	1.3274	6.2187e-05	0.0037196
c105552_g1	1.3282	5.5369e-05	0.0033526
c97927_g1	1.329	8.9617e-05	0.0050952
c115766_g2	1.3293	2.1289e-06	0.00018375
c89762_g1	1.3305	1.4619e-06	0.00013058
c54394_g1	1.3319	3.6872e-05	0.0023379
c104113_g2	1.3322	1.0326e-05	0.00074898
c107099_g1	1.3322	0.00022912	0.011321
c113937_g1	1.3324	1.5319e-07	1.6923e-05
c104052_g1	1.3326	1.2568e-07	1.418e-05
c121513_g1	1.334	6.9185e-06	0.00052681
c121933_g1	1.336	6.877e-07	6.6442e-05
c109565_g1	1.3364	2.1498e-05	0.0014409
c155960_g1	1.3381	5.0017e-06	0.00039473
c86170_g1	1.3389	0.00028982	0.013718
c101378_g1	1.34	1.1833e-07	1.3396e-05
c118435_g4	1.34	3.9058e-05	0.0024625
c119258_g2	1.3402	7.7579e-06	0.00058222
c106381_g1	1.3408	0.001068	0.040727
c121804_g1	1.3414	4.6171e-07	4.6317e-05
c108821_g1	1.3421	6.5039e-07	6.3124e-05
c104497_g1	1.3469	0.00023294	0.011474
c117077_g6	1.3472	1.0313e-06	9.6074e-05
c123079_g2	1.349	0.00086649	0.034241
c121526_g1	1.3494	4.2537e-07	4.3042e-05
c121457_g3	1.3497	0.00070158	0.02871
c125774_g4	1.3516	1.1141e-07	1.2699e-05
c113798_g1	1.3518	3.2475e-07	3.3867e-05
c38932_g1	1.3519	1.7511e-05	0.0012027
c125352_g3	1.353	6.456e-08	7.6137e-06
c96469_g1	1.3538	0.00054279	0.023305
c97218_g2	1.354	3.709e-06	0.00030201
c91565_g1	1.3547	1.4471e-07	1.6128e-05
c100545_g1	1.3547	3.8689e-07	3.9605e-05
c122491_g1	1.3553	0.00040316	0.018102
c93583_g1	1.3562	1.6381e-07	1.7983e-05
c111714_g2	1.3569	0.00040727	0.018242
c93546_g1	1.3572	8.8889e-05	0.0050573
c116415_g2	1.3575	0.0009359	0.036519
c105003_g1	1.3586	0.00035287	0.016219
c123745_g3	1.3589	0.0011261	0.042523
c117539_g3	1.3595	6.8227e-06	0.00051994
c99387_g1	1.3598	1.7141e-05	0.0011807
c117121_g2	1.3601	1.4404e-05	0.0010084
c92021_g1	1.362	1.2115e-07	1.3697e-05
c121184_g1	1.3623	0.00022811	0.011278
c98378_g1	1.3628	8.6712e-06	0.00064209
c119117_g1	1.3634	5.6824e-05	0.0034283
c107624_g1	1.3637	4.9185e-07	4.8996e-05
c93890_g1	1.3654	0.0005399	0.02321
c125457_g4	1.3668	5.3454e-06	0.00041849
c122173_g2	1.3707	5.5097e-05	0.0033386
c107666_g1	1.3711	2.1668e-07	2.3367e-05
c61171_g2	1.3745	0.00064741	0.026912
c105765_g1	1.3753	3.1137e-05	0.0020141
c117849_g7	1.3754	9.2981e-05	0.0052418
c122581_g1	1.3763	6.703e-05	0.003975
c125457_g3	1.3774	0.00010574	0.0058617
c106340_g2	1.3777	8.1932e-06	0.00061131
c114153_g4	1.3778	3.4628e-06	0.00028404
c111878_g2	1.3779	0.0007443	0.03017
c114396_g1	1.378	2.2436e-07	2.4122e-05
c113603_g1	1.3786	1.1827e-07	1.3396e-05
c115258_g1	1.3794	0.00017841	0.0091826
c111273_g1	1.381	8.1669e-06	0.00060989
c76764_g1	1.3816	3.1557e-07	3.3034e-05
c97366_g1	1.3819	4.8409e-08	5.8581e-06
c117896_g9	1.3829	0.0003668	0.016739
c107699_g1	1.383	0.00085594	0.03391
c101502_g1	1.3856	3.2996e-06	0.00027212
c105766_g1	1.3857	0.0003414	0.01577
c121347_g1	1.3863	0.0011884	0.044393
c109534_g1	1.3866	0.00029412	0.013878
c125160_g2	1.3873	4.3816e-07	4.4229e-05
c84234_g1	1.3873	6.4029e-07	6.2264e-05
c114746_g1	1.3892	3.6195e-06	0.00029568
c88808_g1	1.3892	6.3395e-06	0.0004874
c115070_g2	1.3901	0.00075627	0.03058
c106111_g1	1.3902	2.3927e-07	2.561e-05
c113095_g2	1.3904	0.00064383	0.026808
c120604_g1	1.3917	7.6738e-05	0.0044634
c125170_g3	1.3923	1.2736e-05	0.00090261
c111590_g1	1.3924	0.00035904	0.016474
c123900_g2	1.3927	0.0013558	0.049302
c101956_g1	1.3928	0.00095972	0.037262
c109682_g1	1.3943	3.6993e-07	3.7986e-05
c103874_g1	1.3943	5.3079e-06	0.00041575
c125125_g1	1.3944	7.9479e-08	9.2618e-06
c120489_g4	1.3948	1.0275e-07	1.1752e-05
c66014_g1	1.3976	6.8252e-06	0.00051994
c108399_g1	1.3979	0.00020805	0.010465
c117666_g1	1.3979	0.0002786	0.013287
c111296_g1	1.3985	8.5206e-05	0.004876
c109561_g1	1.3988	4.5041e-08	5.4864e-06
c121783_g5	1.3996	0.00019439	0.0098561
c85701_g1	1.3999	7.759e-07	7.4147e-05
c119928_g1	1.4011	3.2507e-08	4.0544e-06
c122373_g2	1.4016	1.5245e-07	1.6869e-05
c116814_g2	1.4031	3.6882e-08	4.5524e-06
c121559_g1	1.4042	1.9812e-05	0.0013419
c120366_g1	1.405	7.4473e-05	0.0043499
c120160_g1	1.4072	1.4607e-07	1.6235e-05
c72357_g1	1.4087	0.00077825	0.031265
c116884_g1	1.4089	1.0848e-05	0.00078209
c111237_g2	1.409	1.4341e-06	0.00012857
c118982_g3	1.4102	3.0688e-08	3.8651e-06
c110636_g2	1.4104	0.00014423	0.0076256
c96590_g1	1.4105	0.00025908	0.012504
c115238_g1	1.4113	2.5392e-05	0.0016743
c111339_g1	1.4117	2.916e-08	3.6866e-06
c111966_g1	1.4127	3.1086e-08	3.8976e-06
c96830_g1	1.4143	3.3156e-06	0.00027317
c110739_g1	1.4144	0.00019173	0.009742
c112239_g1	1.4155	6.3422e-07	6.174e-05
c116146_g3	1.4157	0.0004809	0.021054
c122052_g3	1.4174	5.0432e-05	0.0030896
c114892_g4	1.4175	1.6289e-06	0.0001438
c109281_g2	1.4203	3.1691e-05	0.0020467
c119641_g5	1.4204	1.5209e-06	0.00013548
c112422_g1	1.4215	0.00066486	0.027457
c124314_g1	1.4235	1.7184e-08	2.2599e-06
c108590_g1	1.4241	0.00022697	0.011228
c113354_g4	1.425	0.00013756	0.0073171
c20809_g1	1.4258	2.7467e-07	2.9156e-05
c118711_g1	1.4262	8.8625e-08	1.0213e-05
c125150_g1	1.4272	3.0737e-08	3.8655e-06
c89454_g1	1.4284	0.00059294	0.025083
c185798_g1	1.4291	0.0011298	0.042624
c77134_g1	1.4319	0.0012057	0.04486
c121600_g9	1.4333	6.5448e-05	0.0038909
c112717_g12	1.4333	0.00057954	0.024597
c113743_g1	1.4341	1.9144e-06	0.00016653
c118657_g8	1.4342	2.6276e-07	2.7962e-05
c94255_g1	1.4347	3.5055e-07	3.6263e-05
c121409_g1	1.4349	2.8485e-05	0.0018584
c115712_g2	1.4356	1.342e-07	1.506e-05
c121964_g1	1.4361	3.8967e-06	0.00031522
c121550_g1	1.4383	1.0439e-06	9.6924e-05
c106329_g1	1.4386	1.8525e-05	0.0012645
c72849_g1	1.4393	8.8764e-05	0.0050536
c92398_g1	1.4394	1.7099e-06	0.00015039
c97216_g1	1.4401	0.00010247	0.0056995
c116488_g1	1.4411	1.3294e-06	0.00012015
c117123_g5	1.4421	2.1819e-05	0.0014601
c123455_g1	1.4422	1.6873e-06	0.00014864
c107353_g1	1.4427	2.5703e-05	0.0016921
c119965_g2	1.4428	2.591e-06	0.00021888
c117525_g1	1.4435	2.149e-08	2.8005e-06
c80802_g1	1.4447	1.6507e-08	2.1819e-06
c117440_g1	1.4456	7.8219e-08	9.1277e-06
c107587_g1	1.446	9.2263e-08	1.0618e-05
c122107_g1	1.446	1.058e-07	1.2084e-05
c112293_g1	1.4461	2.2219e-06	0.00019069
c123582_g1	1.4479	5.0875e-05	0.0031144
c111466_g1	1.4498	3.642e-08	4.4987e-06
c95581_g1	1.4521	0.0009057	0.035528
c110670_g1	1.4522	0.00013956	0.0074094
c123359_g1	1.4531	1.723e-08	2.2641e-06
c112259_g1	1.454	1.5196e-07	1.6838e-05
c122231_g1	1.4543	1.3407e-08	1.7986e-06
c100359_g1	1.4572	7.8108e-06	0.00058592
c116546_g1	1.4575	2.9753e-08	3.7587e-06
c120756_g10	1.4578	0.00017713	0.0091336
c126378_g2	1.4581	1.2118e-05	0.00086433
c121739_g2	1.4595	5.7719e-06	0.00044851
c110007_g1	1.4601	1.4371e-08	1.9187e-06
c99915_g1	1.4605	0.00022623	0.011195
c111569_g2	1.4631	0.00023634	0.011616
c124657_g1	1.4632	2.6416e-06	0.0002227
c122967_g4	1.4649	0.00094646	0.036867
c76698_g1	1.4661	3.2714e-07	3.4053e-05
c103377_g1	1.4663	2.3515e-06	0.00020068
c125647_g4	1.4664	1.5502e-08	2.0615e-06
c124357_g3	1.4666	2.1589e-08	2.8082e-06
c125403_g1	1.4667	4.9291e-07	4.9072e-05
c110807_g1	1.467	1.446e-06	0.00012936
c117312_g1	1.4678	2.2592e-06	0.00019359
c110681_g2	1.4679	2.9456e-05	0.0019172
c91917_g1	1.4681	2.8397e-06	0.00023748
c66504_g1	1.47	1.5324e-07	1.6923e-05
c128169_g1	1.47	0.0011239	0.042469
c100241_g1	1.4702	0.00086275	0.034141
c73716_g1	1.4703	1.3241e-07	1.4899e-05
c23241_g1	1.4709	1.4767e-05	0.0010308
c107707_g2	1.4721	1.3431e-06	0.00012133
c97806_g1	1.4735	7.7511e-05	0.0044989
c120768_g1	1.4762	6.4556e-09	9.1541e-07
c121246_g1	1.4782	1.3638e-08	1.8282e-06
c111783_g1	1.4797	5.681e-07	5.5858e-05
c108283_g1	1.4805	1.1472e-07	1.304e-05
c116393_g8	1.4813	0.00074899	0.030352
c108476_g1	1.4842	1.3644e-06	0.00012298
c58720_g1	1.4843	9.7047e-05	0.0054361
c117688_g2	1.4865	0.0001471	0.0077628
c101836_g1	1.489	0.00011127	0.0061148
c116128_g3	1.4891	0.0006912	0.028384
c108724_g1	1.4898	3.6856e-06	0.00030025
c123716_g2	1.49	4.935e-08	5.9677e-06
c110428_g2	1.49	0.00012648	0.0068145
c105097_g1	1.4908	1.6355e-05	0.0011293
c112554_g1	1.4916	4.0414e-06	0.00032494
c109540_g1	1.4927	1.3785e-07	1.5427e-05
c110993_g1	1.4935	1.0926e-06	0.00010066
c117203_g1	1.4944	1.8509e-05	0.0012639
c104278_g1	1.4946	6.7405e-06	0.0005146
c125834_g1	1.495	2.1718e-08	2.8162e-06
c102515_g1	1.4954	6.2916e-05	0.0037591
c26270_g1	1.4954	7.6904e-05	0.00447
c125793_g3	1.4957	2.4306e-07	2.5965e-05
c101236_g1	1.4962	5.5331e-07	5.4693e-05
c100703_g2	1.4967	8.0889e-07	7.6917e-05
c249391_g1	1.4972	7.1211e-09	1.0021e-06
c108741_g1	1.4973	3.498e-05	0.0022306
c114270_g3	1.4979	6.1999e-05	0.003711
c112007_g1	1.4984	1.9292e-06	0.00016747
c112585_g1	1.5003	3.0659e-08	3.8644e-06
c111618_g1	1.5008	3.1635e-07	3.3095e-05
c112164_g1	1.5039	2.0304e-06	0.00017549
c176055_g1	1.5043	2.2684e-05	0.0015137
c124028_g1	1.5065	4.8198e-08	5.8368e-06
c2692_g1	1.5072	0.00047262	0.020738
c126408_g1	1.5083	6.6318e-06	0.00050753
c39481_g1	1.5112	1.438e-06	0.00012878
c109820_g2	1.512	1.1815e-05	0.00084596
c112615_g1	1.5142	6.3356e-09	8.9992e-07
c113901_g3	1.5159	0.0011754	0.043989
c109666_g1	1.5161	1.1413e-05	0.00082033
c113341_g1	1.517	6.5813e-06	0.00050436
c108597_g1	1.5181	0.0013718	0.049761
c119701_g1	1.5182	0.00026028	0.012557
c125804_g4	1.5187	0.00021415	0.010705
c156011_g1	1.5193	5.403e-06	0.0004226
c112224_g2	1.5203	9.5281e-05	0.005348
c124123_g2	1.5205	0.00057179	0.024299
c119944_g1	1.5222	4.4927e-09	6.526e-07
c115706_g1	1.5223	0.00011102	0.0061059
c123849_g4	1.5227	4.5138e-08	5.4942e-06
c120396_g4	1.5235	1.667e-07	1.8264e-05
c113354_g1	1.5242	2.9767e-05	0.0019352
c113104_g2	1.5243	8.2687e-09	1.1424e-06
c118793_g2	1.5252	0.00090316	0.035437
c114839_g1	1.5255	4.7352e-08	5.7469e-06
c122026_g1	1.5276	3.8243e-09	5.6336e-07
c100032_g1	1.5277	6.9568e-07	6.7135e-05
c109786_g1	1.5285	0.00017673	0.0091185
c119754_g1	1.5294	9.4939e-08	1.0911e-05
c112327_g1	1.5299	7.3159e-08	8.5732e-06
c115063_g2	1.531	0.0010639	0.040599
c89843_g1	1.5314	2.5636e-08	3.2809e-06
c109113_g1	1.5319	6.6847e-08	7.8667e-06
c117143_g1	1.5335	2.6866e-08	3.4251e-06
c116762_g1	1.5338	0.0002256	0.01117
c72365_g1	1.5355	0.00020897	0.010499
c117174_g1	1.5396	1.3295e-07	1.494e-05
c120635_g1	1.541	1.7342e-07	1.8901e-05
c109885_g10	1.5423	0.0003508	0.016138
c121606_g2	1.5432	5.3801e-09	7.7143e-07
c126418_g2	1.5445	8.1499e-06	0.00060889
c116998_g1	1.5459	0.00072907	0.029639
c106271_g2	1.5462	4.6191e-05	0.0028539
c95717_g1	1.5469	5.5829e-05	0.0033754
c120902_g1	1.5472	7.099e-09	9.9983e-07
c151434_g1	1.5495	1.3079e-08	1.7589e-06
c103966_g1	1.55	0.00019439	0.0098561
c96418_g1	1.5501	0.0012369	0.045835
c121992_g1	1.5502	9.3896e-10	1.5306e-07
c46634_g1	1.5506	2.4467e-05	0.0016236
c85937_g1	1.5537	3.5757e-08	4.4267e-06
c96334_g1	1.5556	1.9191e-09	2.9605e-07
c107435_g1	1.5563	7.6196e-08	8.9104e-06
c77354_g1	1.5565	3.3009e-09	4.8928e-07
c121530_g1	1.5587	3.563e-09	5.2627e-07
c124379_g1	1.5593	2.123e-08	2.7702e-06
c57368_g1	1.5593	1.7568e-07	1.9136e-05
c112212_g1	1.5596	1.5892e-05	0.0011035
c123560_g1	1.5604	1.0566e-09	1.7024e-07
c101772_g1	1.5605	0.00079807	0.031961
c112799_g2	1.5611	0.00033895	0.015674
c113248_g1	1.5612	1.2166e-09	1.9377e-07
c106185_g1	1.5627	1.6082e-07	1.7701e-05
c113261_g1	1.5631	1.0417e-06	9.683e-05
c108058_g1	1.5636	2.5452e-05	0.0016769
c120604_g2	1.5639	4.9984e-09	7.1979e-07
c125273_g1	1.5645	1.5259e-05	0.0010624
c124268_g1	1.5648	2.3227e-08	2.9987e-06
c107064_g2	1.5656	4.6145e-07	4.6317e-05
c108526_g1	1.5674	9.298e-08	1.0693e-05
c154804_g1	1.5693	4.5503e-05	0.0028145
c125028_g2	1.5717	1.0564e-06	9.7817e-05
c115702_g3	1.5737	4.5467e-07	4.5785e-05
c122721_g2	1.5737	0.0011448	0.043055
c122063_g1	1.5738	7.1574e-09	1.0055e-06
c120420_g2	1.5748	6.5133e-08	7.6758e-06
c117226_g1	1.5756	3.6577e-07	3.7604e-05
c108548_g1	1.5758	6.7513e-05	0.0039994
c104917_g2	1.5771	0.0010267	0.039449
c118934_g2	1.578	0.0011314	0.042645
c109921_g1	1.5783	7.2693e-09	1.0169e-06
c124402_g2	1.579	7.3192e-09	1.0222e-06
c109630_g4	1.5799	2.0871e-05	0.0014039
c125329_g5	1.5802	3.0503e-08	3.8476e-06
c96648_g1	1.5802	6.0511e-08	7.182e-06
c112268_g3	1.581	0.00019448	0.0098576
c115251_g2	1.5818	9.2483e-05	0.0052155
c102016_g1	1.5861	4.1255e-07	4.1948e-05
c101566_g1	1.5863	1.6315e-05	0.001127
c122136_g1	1.5867	5.0552e-10	8.6195e-08
c115112_g2	1.5867	7.2015e-09	1.0092e-06
c117588_g1	1.5874	4.8857e-10	8.382e-08
c123150_g2	1.5889	2.5378e-06	0.0002146
c105960_g1	1.5907	1.5054e-05	0.001049
c45894_g1	1.5945	8.3027e-05	0.0047775
c115461_g1	1.5964	5.2255e-10	8.8917e-08
c117701_g1	1.5987	1.5062e-09	2.3673e-07
c121769_g2	1.599	3.0882e-08	3.8778e-06
c86026_g1	1.599	5.1633e-06	0.00040538
c59878_g1	1.5993	8.6676e-06	0.00064209
c110893_g1	1.5994	4.7115e-09	6.8083e-07
c102284_g3	1.6001	3.6072e-06	0.00029486
c122395_g1	1.601	9.9075e-10	1.6056e-07
c112634_g4	1.6026	2.4182e-06	0.00020553
c176901_g1	1.603	2.158e-06	0.00018588
c92294_g1	1.6042	0.00031342	0.014661
c116406_g1	1.6049	6.211e-10	1.0357e-07
c105681_g1	1.6056	8.0535e-05	0.0046486
c96532_g1	1.6058	5.2205e-10	8.8917e-08
c119082_g1	1.6071	3.1068e-06	0.00025724
c116626_g1	1.34138	2.2521e-07	2.4198e-05
c109579_g2	1.6132	5.398e-10	9.1479e-08
c115207_g1	1.6139	7.0053e-10	1.1578e-07
c98863_g1	1.6141	0.00082418	0.032848
c110569_g1	1.6142	4.3329e-08	5.2972e-06
c122674_g3	1.615	5.1178e-08	6.1575e-06
c121163_g1	1.6171	4.2311e-10	7.3881e-08
c117600_g1	1.6194	1.5907e-06	0.00014094
c209832_g1	1.6205	3.3634e-07	3.4923e-05
c138048_g1	1.6218	4.214e-07	4.2718e-05
c121108_g2	1.6223	0.00024853	0.012086
c109982_g1	1.6237	5.7275e-08	6.8221e-06
c119042_g3	1.6243	6.1006e-06	0.00047054
c101009_g1	1.6246	3.5973e-05	0.0022878
c121048_g1	1.6328	2.4299e-08	3.1265e-06
c96555_g1	1.6332	0.00065251	0.027034
c124901_g2	1.6336	1.7857e-10	3.2941e-08
c86103_g1	1.634	6.4545e-08	7.6137e-06
c118033_g3	1.6359	1.9472e-09	2.9983e-07
c125138_g1	1.6383	1.2084e-08	1.628e-06
c117676_g1	1.6386	4.6212e-06	0.00036731
c17240_g1	1.6411	4.9175e-07	4.8996e-05
c117105_g2	1.6423	1.6435e-10	3.0462e-08
c114044_g1	1.643	5.4538e-07	5.3942e-05
c101051_g2	1.6438	0.00017328	0.0089601
c124812_g3	1.6442	0.00029315	0.013856
c122310_g1	1.6443	0.00015372	0.0080586
c113930_g1	1.6447	1.4306e-05	0.0010024
c103931_g1	1.6453	4.4247e-08	5.3975e-06
c124025_g4	1.6488	0.00040715	0.018241
c109947_g2	1.6543	1.1674e-05	0.00083676
c123789_g2	1.6621	1.351e-10	2.5432e-08
c113557_g1	1.6629	2.0211e-08	2.6413e-06
c108950_g1	1.6635	4.6171e-10	7.9952e-08
c102106_g1	1.6644	0.00094211	0.036724
c113411_g1	1.6656	4.3896e-07	4.4283e-05
c123150_g3	1.6664	2.9438e-07	3.103e-05
c104432_g1	1.6667	3.9552e-06	0.00031949
c106245_g1	1.667	5.0252e-07	4.9939e-05
c106055_g1	1.6683	0.0007775	0.031265
c153718_g1	1.6691	1.9153e-07	2.078e-05
c96291_g1	1.6707	8.5284e-05	0.0048788
c114916_g1	1.6717	1.1996e-10	2.2809e-08
c115262_g5	1.6721	4.6994e-10	8.1124e-08
c125281_g1	1.6727	9.7468e-11	1.8747e-08
c124736_g1	1.6727	1.1883e-08	1.6033e-06
c107529_g3	1.6748	6.5562e-08	7.721e-06
c121446_g3	1.675	1.0289e-05	0.00074662
c110749_g2	1.6754	0.00019476	0.0098654
c91877_g1	1.6763	6.707e-05	0.003976
c91221_g1	1.6778	7.69e-05	0.00447
c113586_g1	1.6788	1.1667e-10	2.2209e-08
c124516_g8	1.6802	1.268e-09	2.0118e-07
c108817_g1	1.6805	0.00052653	0.022705
c110713_g1	1.6818	4.2738e-07	4.322e-05
c114879_g1	1.6825	1.5244e-07	1.6869e-05
c32698_g1	1.6826	0.00039866	0.017929
c109508_g1	1.6828	7.6078e-11	1.489e-08
c2853_g1	1.6833	4.896e-05	0.0030105
c123756_g1	1.6837	6.0969e-11	1.2235e-08
c119715_g1	1.6837	9.0257e-05	0.0051211
c119298_g3	1.6854	5.0028e-10	8.5564e-08
c106757_g1	1.6864	8.1041e-11	1.5769e-08
c108664_g3	1.688	1.4767e-05	0.0010308
c121985_g2	1.6881	1.8938e-05	0.0012911
c123694_g3	1.69	0.00064715	0.026912
c449_g1	1.6919	0.00014892	0.0078489
c120344_g1	1.6922	6.6852e-09	9.4636e-07
c116252_g8	1.6926	0.00023765	0.011656
c164184_g1	1.6959	4.2293e-05	0.0026375
c109513_g1	1.6999	9.1228e-05	0.0051622
c153000_g1	1.7009	6.8509e-09	9.6652e-07
c91800_g1	1.7018	0.00081822	0.032634
c121550_g2	1.7018	0.0010057	0.038769
c122023_g1	1.7042	2.2139e-06	0.0001901
c117225_g1	1.7047	1.6269e-08	2.1548e-06
c110841_g2	1.7048	1.5776e-07	1.7388e-05
c124253_g1	1.7057	1.1658e-06	0.00010664
c107054_g2	1.7057	6.6766e-05	0.0039622
c22251_g2	1.7059	0.00014379	0.0076049
c117226_g4	1.7074	7.2207e-08	8.4677e-06
c121304_g1	1.7074	3.1437e-05	0.0020319
c91124_g1	1.7082	0.00070389	0.028783
c102208_g1	1.7101	0.0011851	0.044279
c116714_g1	1.7104	5.0467e-08	6.0807e-06
c113397_g1	1.7117	2.5665e-08	3.2821e-06
c102697_g1	1.7125	8.1947e-08	9.5162e-06
c116796_g1	1.7131	5.2442e-08	6.2914e-06
c121783_g1	1.7136	5.342e-05	0.0032488
c199283_g1	1.7143	0.0010921	0.041457
c105624_g1	1.7146	0.00016622	0.0086374
c118793_g1	1.7164	8.4852e-05	0.0048608
c110707_g1	1.7167	4.0228e-10	7.0465e-08
c118570_g5	1.7187	2.5731e-08	3.2855e-06
c141683_g1	1.7197	3.2839e-05	0.0021119
c91263_g1	1.7206	0.00016505	0.0085904
c574_g1	1.7208	6.4287e-08	7.5956e-06
c126377_g3	1.7213	1.7423e-06	0.00015283
c123745_g1	1.7216	1.241e-05	0.00088174
c123322_g7	1.7224	8.9732e-10	1.4684e-07
c122433_g1	1.7246	3.2052e-11	6.6561e-09
c116067_g1	1.7246	9.502e-08	1.0913e-05
c110806_g2	1.7266	2.3786e-09	3.6027e-07
c101609_g1	1.7275	3.1235e-07	3.2759e-05
c118738_g1	1.7276	2.1695e-11	4.6028e-09
c102675_g1	1.729	6.78e-11	1.3428e-08
c98759_g1	1.7291	5.4311e-07	5.375e-05
c108664_g8	1.7311	0.00031225	0.01461
c100300_g1	1.7327	1.024e-05	0.00074369
c110416_g1	1.7339	1.8246e-11	3.9109e-09
c123292_g1	1.734	9.4715e-10	1.5409e-07
c117155_g6	1.7346	1.2023e-09	1.9185e-07
c119931_g5	1.7355	8.6314e-10	1.4153e-07
c103518_g1	1.7372	0.00050456	0.021905
c63105_g1	1.7389	1.0468e-06	9.7143e-05
c109559_g1	1.7392	0.0012961	0.047553
c123603_g2	1.7432	1.2232e-11	2.7088e-09
c119065_g3	1.7449	9.6579e-07	9.0377e-05
c120279_g2	1.7465	1.5695e-11	3.4124e-09
c37586_g1	1.7468	0.0011214	0.042423
c12776_g1	1.7477	1.0779e-06	9.9477e-05
c100315_g1	1.7506	3.8053e-06	0.00030894
c123585_g4	1.7514	1.0807e-08	1.4628e-06
c107891_g2	1.7517	3.2093e-06	0.0002652
c111965_g1	1.7522	4.8204e-06	0.00038169
c122427_g1	1.7524	2.1033e-05	0.0014137
c118719_g1	1.7528	1.8026e-05	0.001234
c121763_g1	1.7545	0.0004243	0.018878
c110624_g1	1.7553	1.1071e-11	2.4648e-09
c119814_g2	1.7553	2.3117e-09	3.5172e-07
c78179_g1	1.7555	4.9493e-09	7.1395e-07
c119303_g5	1.7556	0.00024863	0.012088
c83819_g1	1.7566	4.8325e-06	0.00038246
c65310_g1	1.7571	4.9639e-05	0.0030477
c123384_g3	1.7587	8.1867e-08	9.5135e-06
c124217_g5	1.7591	8.9372e-06	0.00065974
c25338_g1	1.7602	8.6824e-07	8.2031e-05
c19160_g1	1.7602	0.00041041	0.018368
c117993_g4	1.7607	2.7406e-07	2.9109e-05
c96386_g1	1.7617	0.001302	0.047717
c104244_g1	1.7649	3.4132e-07	3.5418e-05
c124272_g6	1.7654	8.4652e-12	1.9285e-09
c119408_g1	1.7655	2.7555e-05	0.0018027
c112686_g1	1.7657	1.0413e-06	9.683e-05
c111132_g1	1.767	1.1252e-10	2.1445e-08
c225402_g1	1.7683	5.7764e-06	0.00044865
c120918_g1	1.769	0.00040918	0.018323
c95202_g2	1.7694	8.1859e-05	0.0047168
c73691_g2	1.7701	0.0008305	0.033084
c53581_g1	1.7702	3.3562e-05	0.0021516
c105524_g2	1.7703	2.3942e-09	3.6229e-07
c112615_g2	1.7708	0.00040371	0.018112
c48265_g1	1.7724	0.0011155	0.042247
c189373_g1	1.775	0.00018588	0.0095007
c108963_g1	1.7751	3.9549e-09	5.8107e-07
c112281_g4	1.7759	0.0007547	0.030524
c251651_g1	1.776	4.4967e-09	6.5262e-07
c38266_g1	1.7785	3.3878e-08	4.2192e-06
c110611_g1	1.7797	6.0521e-09	8.6332e-07
c125316_g2	1.7799	6.604e-09	9.3565e-07
c60978_g1	1.7835	7.9291e-05	0.0045895
c112357_g1	1.7864	4.3411e-12	1.0239e-09
c85043_g1	1.7872	1.9085e-05	0.0013001
c120667_g3	1.7876	0.0002528	0.012251
c109291_g1	1.7884	1.3655e-08	1.829e-06
c108915_g1	1.7885	6.7774e-12	1.5719e-09
c105998_g1	1.7895	4.9392e-05	0.0030349
c126700_g1	1.7927	0.00051876	0.02245
c110502_g1	1.7949	9.4719e-05	0.0053236
c26630_g1	1.7968	0.00019121	0.009721
c121530_g4	1.7982	0.0002118	0.01061
c113826_g1	1.7984	0.00051485	0.022311
c105899_g1	1.7993	0.00054308	0.023311
c118826_g2	1.8002	2.9976e-11	6.2485e-09
c51872_g1	1.805	0.0011418	0.042953
c105055_g2	1.8055	1.4251e-06	0.00012804
c98037_g1	1.806	1.4797e-08	1.9725e-06
c108176_g1	1.8079	3.2351e-09	4.7996e-07
c124727_g3	1.8096	3.558e-07	3.6693e-05
c105533_g1	1.8103	8.6042e-05	0.004912
c95228_g1	1.8129	1.9132e-12	4.7405e-10
c109783_g1	1.8163	3.0953e-12	7.459e-10
c50092_g1	1.8167	1.8883e-09	2.9156e-07
c118631_g4	1.8178	3.6785e-05	0.0023342
c94450_g1	1.8187	7.6215e-12	1.7506e-09
c111233_g1	1.8198	1.1366e-06	0.00010425
c109942_g1	1.8199	5.7312e-10	9.6537e-08
c104094_g1	1.8202	6.8579e-09	9.6669e-07
c75378_g1	1.8252	0.00060253	0.025358
c101644_g1	1.826	1.0504e-11	2.3638e-09
c183982_g1	1.8267	0.00029396	0.013875
c118426_g1	1.8319	0.00049103	0.021424
c120919_g6	1.8337	1.4129e-12	3.5806e-10
c125849_g1	1.8341	5.6575e-09	8.098e-07
c93943_g1	1.8371	3.9829e-06	0.00032133
c122574_g2	1.8388	2.231e-12	5.4873e-10
c102689_g1	1.839	5.2114e-08	6.2611e-06
c120221_g1	1.8433	1.2264e-09	1.9514e-07
c51451_g1	1.8442	0.0013463	0.049051
c118208_g1	1.8453	1.4796e-10	2.7724e-08
c103580_g1	1.849	4.4191e-07	4.4527e-05
c114975_g1	1.849	4.9894e-07	4.9624e-05
c111703_g1	1.8492	0.00023421	0.011528
c119298_g6	1.8493	0.00038878	0.017603
c98884_g1	1.8496	2.7814e-05	0.0018174
c50966_g1	1.8502	3.7821e-06	0.00030736
c108025_g2	1.8514	6.3979e-13	1.7098e-10
c118006_g4	1.8515	6.3504e-05	0.0037888
c214253_g1	1.8518	8.6744e-07	8.2002e-05
c107917_g3	1.8523	0.00039551	0.017815
c255057_g1	1.8525	0.0010798	0.041101
c88015_g1	1.8534	1.8521e-09	2.8623e-07
c89960_g1	1.8578	6.6829e-13	1.7774e-10
c106511_g1	1.858	3.3997e-10	6.0569e-08
c124046_g2	1.8584	2.4957e-05	0.0016515
c124001_g4	1.8588	1.4361e-05	0.0010058
c112174_g2	1.8592	2.0275e-13	5.8595e-11
c99729_g2	1.8607	4.7431e-10	8.1625e-08
c122733_g2	1.8617	1.6005e-12	4.0439e-10
c126075_g1	1.8623	6.8858e-13	1.8255e-10
c120896_g3	1.8625	1.8644e-05	0.0012721
c117869_g3	1.8628	0.00017461	0.0090231
c38470_g1	1.863	0.00011051	0.006084
c112709_g1	1.866	0.00019099	0.0097131
c105482_g1	1.8666	3.6611e-05	0.0023263
c123852_g3	1.8672	9.898e-10	1.6056e-07
c110301_g1	1.8685	2.4243e-05	0.00161
c77628_g1	1.8704	6.8167e-05	0.004028
c151663_g1	1.8739	2.9025e-06	0.000242
c124078_g1	1.8745	3.2805e-10	5.857e-08
c115012_g1	1.8747	4.9583e-09	7.1463e-07
c85937_g2	1.8756	1.0411e-08	1.4161e-06
c110990_g2	1.8782	2.2131e-05	0.0014797
c123467_g1	1.8795	2.2651e-13	6.5013e-11
c114209_g1	1.8808	3.6001e-07	3.7081e-05
c112463_g1	1.881	9.1182e-06	0.00067113
c107702_g5	1.8856	0.0011921	0.044483
c110036_g2	1.8862	2.7759e-08	3.5228e-06
c117841_g3	1.8864	1.3878e-08	1.8544e-06
c79257_g1	1.8869	4.0387e-11	8.2636e-09
c113048_g1	1.8894	1.9738e-06	0.00017116
c125020_g1	1.8899	1.0476e-07	1.1974e-05
c36371_g1	1.8904	8.0603e-09	1.1164e-06
c116367_g2	1.8909	2.8382e-06	0.00023748
c125908_g2	1.8961	2.8252e-09	4.2291e-07
c10003_g1	1.8983	4.7598e-07	4.7557e-05
c126008_g1	1.9007	1.079e-07	1.2307e-05
c54900_g1	1.9011	0.00058995	0.024975
c118432_g4	1.9029	0.0010834	0.041213
c101311_g1	1.9034	6.2965e-06	0.00048431
c114942_g1	1.906	5.3792e-08	6.4441e-06
c111117_g1	1.9063	2.1938e-09	3.3532e-07
c114711_g1	1.9075	1.3133e-09	2.0798e-07
c110990_g1	1.9076	0.0003491	0.016077
c97404_g1	1.9077	5.496e-10	9.2856e-08
c88349_g1	1.9077	7.1713e-05	0.0042108
c69030_g1	1.9094	0.0003676	0.016772
c114812_g3	1.9098	0.00037734	0.017155
c78797_g1	1.9103	1.6796e-05	0.0011588
c93482_g1	1.914	4.2464e-07	4.2994e-05
c102416_g1	1.9162	1.4776e-08	1.9712e-06
c124395_g2	1.9172	3.3985e-09	5.0241e-07
c103206_g1	1.9175	2.1788e-06	0.00018738
c102644_g1	1.922	1.7776e-06	0.00015528
c22251_g1	1.922	0.00015565	0.0081493
c99847_g1	1.9229	7.8907e-11	1.539e-08
c99214_g1	1.9243	0.00049951	0.021737
c112309_g1	1.9245	2.2289e-10	4.0622e-08
c121425_g1	1.9246	1.0161e-13	3.0642e-11
c106165_g1	1.9255	2.3755e-09	3.6011e-07
c45905_g1	1.9261	0.00031029	0.014535
c102263_g1	1.9283	7.9649e-05	0.0046038
c111206_g1	1.9286	1.6222e-05	0.0011216
c124516_g3	1.9301	1.4394e-06	0.00012884
c107278_g1	1.9302	0.00063053	0.026352
c122484_g1	1.9317	2.6569e-12	6.477e-10
c124176_g3	1.9325	0.00011798	0.0064254
c125042_g4	1.9327	0.00023122	0.011408
c112750_g1	1.9342	9.3494e-14	2.8296e-11
c98983_g1	1.9342	7.1084e-05	0.0041753
c75100_g1	1.9385	0.00017111	0.0088577
c115299_g3	1.9395	1.4315e-10	2.6852e-08
c107989_g1	1.9457	5.1702e-05	0.0031581
c124046_g1	1.9459	1.0281e-13	3.0909e-11
c103565_g1	1.9462	3.3361e-06	0.00027459
c126044_g2	1.9462	0.0004033	0.018103
c118426_g3	1.9471	1.1546e-06	0.00010579
c112764_g1	1.9473	6.2556e-05	0.0037403
c56348_g1	1.9474	1.0799e-11	2.4145e-09
c120283_g1	1.9504	7.2867e-14	2.2255e-11
c123900_g1	1.9539	3.0308e-14	9.7008e-12
c110126_g1	1.9555	2.6191e-06	0.00022091
c125579_g1	1.9562	0.00045604	0.020092
c83585_g1	1.9578	5.473e-08	6.5424e-06
c118003_g2	1.9584	5.5835e-05	0.0033754
c82775_g1	1.9586	8.9207e-05	0.0050736
c121123_g1	1.9611	0.00012227	0.0066266
c123521_g1	1.9613	8.5643e-05	0.004896
c112534_g2	1.9662	0.00087643	0.034567
c103811_g1	1.968	8.902e-11	1.7221e-08
c8839_g1	1.9696	0.00099354	0.038414
c125688_g1	1.9709	1.5138e-13	4.46e-11
c125133_g4	1.9713	8.9917e-13	2.3539e-10
c105874_g1	1.9752	6.7641e-05	0.0040055
c120595_g1	1.9755	7.3383e-11	1.4431e-08
c119799_g4	1.9795	1.006e-07	1.153e-05
c120883_g4	1.9847	3.1466e-07	3.2959e-05
c124812_g2	1.9954	0.00018633	0.0095166
c61113_g2	1.9989	1.5703e-09	2.461e-07
c106171_g1	2.0001	6.1708e-13	1.6544e-10
c124898_g1	2.0006	4.3012e-07	4.347e-05
c76301_g1	2.0031	5.6125e-07	5.5217e-05
c81315_g1	2.0052	0.00030758	0.014432
c109579_g1	2.0063	4.7685e-07	4.7587e-05
c125150_g3	2.0068	2.4279e-06	0.00020625
c105771_g1	2.0078	0.0011095	0.042051
c124661_g2	2.008	5.9916e-13	1.6167e-10
c116445_g1	2.0091	6.3786e-15	2.2022e-12
c104116_g1	2.0106	3.0741e-07	3.2302e-05
c114588_g1	2.0117	6.0614e-08	7.1891e-06
c120919_g4	2.0119	3.3979e-06	0.00027912
c219208_g1	2.0122	3.2062e-05	0.0020691
c44626_g1	2.0126	0.0004214	0.018784
c91925_g1	2.0137	0.0012754	0.046958
c106497_g2	2.0184	7.5347e-05	0.0043963
c109121_g1	2.0186	7.2071e-11	1.4206e-08
c135699_g1	2.0219	0.00023151	0.011419
c122817_g4	2.0234	7.7677e-11	1.5168e-08
c98613_g2	2.0243	0.00033407	0.015479
c92062_g1	2.0269	0.00011841	0.0064405
c123230_g4	2.028	3.5891e-09	5.2966e-07
c110074_g2	2.029	0.00076669	0.030949
c118518_g3	2.0294	3.4486e-08	4.282e-06
c77532_g1	2.032	5.8635e-08	6.9741e-06
c107529_g2	2.0322	0.0013407	0.048877
c113718_g2	2.0349	0.00041587	0.018586
c106271_g1	2.0353	4.7272e-11	9.5784e-09
c85500_g1	2.0364	3.4675e-05	0.002218
c99691_g1	2.0367	1.8667e-12	4.6323e-10
c117869_g1	2.0377	1.3311e-14	4.4751e-12
c120128_g4	2.0377	9.7297e-05	0.0054446
c117829_g1	2.0393	0.00042407	0.018873
c122050_g1	2.0428	6.1097e-09	8.7005e-07
c118711_g3	2.0429	2.1709e-10	3.9738e-08
c123016_g2	2.046	2.945e-15	1.0449e-12
c120001_g1	2.049	0.0012362	0.045822
c111229_g1	2.0508	1.2637e-06	0.00011453
c114491_g1	2.0518	0.00032374	0.015076
c74760_g1	2.0522	7.2446e-07	6.9631e-05
c115822_g1	2.0523	4.0022e-13	1.105e-10
c109859_g1	2.0528	0.0013267	0.048474
c105626_g1	2.054	0.00056423	0.024058
c118675_g4	2.0543	7.4704e-15	2.558e-12
c115124_g1	2.0567	1.5136e-06	0.00013497
c104487_g1	2.0573	8.3494e-09	1.1526e-06
c112799_g3	2.0575	0.00042961	0.019079
c121365_g1	2.0578	1.0767e-05	0.00077759
c115404_g1	2.0583	3.4089e-06	0.00027989
c116493_g1	2.0589	3.4134e-05	0.0021851
c112999_g1	2.0595	5.0093e-06	0.00039515
c119250_g1	2.0616	1.5276e-07	1.6893e-05
c119764_g1	2.0618	6.9772e-05	0.0041113
c103498_g1	2.0625	0.0011275	0.042563
c123878_g2	2.0644	0.00051992	0.022478
c111082_g1	2.0647	3.7821e-05	0.0023935
c119832_g1	2.0671	1.0868e-15	4.1097e-13
c114107_g2	2.0673	1.769e-09	2.7493e-07
c122550_g2	2.0681	3.8255e-05	0.0024164
c114199_g1	2.0692	2.3659e-13	6.7673e-11
c154485_g1	2.0696	3.4826e-05	0.0022242
c114518_g3	2.0698	1.3164e-06	0.00011904
c114552_g2	2.0745	0.00012617	0.0068002
c86288_g1	2.0748	5.9641e-06	0.00046173
c114376_g3	2.0789	2.1448e-14	6.9718e-12
c114391_g4	2.0794	0.00030836	0.014464
c116122_g1	2.0798	3.4366e-08	4.2704e-06
c110589_g1	2.0801	2.1846e-08	2.8306e-06
c111744_g2	2.0805	0.00048497	0.02121
c105440_g1	2.0817	2.7119e-10	4.8943e-08
c107961_g1	2.0834	7.0294e-10	1.1606e-07
c107727_g1	2.0872	4.3444e-07	4.388e-05
c119921_g2	2.0874	8.3787e-05	0.0048097
c25150_g1	2.0896	6.7803e-05	0.0040109
c88349_g2	2.0899	2.8535e-06	0.00023852
c124936_g1	2.0917	2.9753e-14	9.5414e-12
c99000_g2	2.0922	3.1319e-08	3.9151e-06
c111771_g2	2.0945	1.3705e-08	1.8327e-06
c119158_g2	2.0951	1.3477e-05	0.0009495
c125785_g1	2.096	4.601e-05	0.0028448
c122395_g3	2.0961	3.9113e-13	1.0852e-10
c72783_g1	2.0964	2.4078e-09	3.6403e-07
c107171_g1	2.0964	1.0468e-08	1.4207e-06
c114491_g2	2.0965	7.6822e-06	0.00057731
c108786_g1	2.0965	3.2268e-05	0.00208
c117984_g2	2.0978	4.41e-05	0.0027359
c111092_g1	2.0982	1.097e-09	1.7624e-07
c119221_g1	2.0997	6.3413e-13	1.6974e-10
c107277_g1	2.0997	5.138e-09	7.3735e-07
c108389_g1	2.1015	1.5462e-15	5.7169e-13
c104601_g1	2.1034	9.9706e-06	0.00072637
c121392_g1	2.1041	1.7899e-10	3.2981e-08
c103358_g1	2.1042	5.3087e-05	0.0032321
c121457_g1	2.1061	0.00031103	0.014561
c113686_g10	2.1063	1.4953e-06	0.00013341
c61488_g1	2.1077	0.00051516	0.022319
c102668_g1	2.1082	0.00059355	0.025096
c121814_g4	2.1093	2.9393e-07	3.1003e-05
c116158_g1	2.1102	2.4654e-15	8.8412e-13
c111297_g1	2.1102	0.00034072	0.015752
c103847_g1	2.1118	0.00013625	0.0072589
c125327_g3	2.1129	6.02e-07	5.8844e-05
c122992_g1	2.1149	1.9948e-16	8.3581e-14
c123380_g1	2.1173	1.8256e-15	6.6469e-13
c59242_g1	2.118	0.0008175	0.032613
c120096_g1	2.1186	9.1329e-10	1.4917e-07
c126119_g1	2.1203	0.00051551	0.022329
c105730_g1	2.1239	3.0331e-12	7.3202e-10
c92724_g2	1.86846	1.64e-15	6.0238e-13
c100344_g1	2.1288	3.2133e-08	4.012e-06
c120455_g2	2.1292	0.00063444	0.026496
c111322_g17	2.1318	4.1033e-07	4.1773e-05
c106041_g1	2.1352	1.9757e-09	3.0365e-07
c122756_g1	2.1359	1.7691e-13	5.1485e-11
c249788_g1	2.1385	3.7854e-05	0.0023939
c81304_g1	2.1404	2.1687e-08	2.8143e-06
c17839_g1	2.1414	5.5847e-05	0.0033754
c124293_g1	2.1436	0.00023707	0.011634
c117655_g6	2.1451	3.2734e-13	9.1589e-11
c116977_g3	2.1462	0.0001898	0.009667
c105934_g1	2.1471	2.6891e-08	3.4257e-06
c111090_g1	2.1479	3.992e-06	0.00032174
c124223_g8	2.1481	8.385e-05	0.0048116
c110036_g1	2.1487	0.00040388	0.018115
c114118_g2	2.1503	1.7418e-16	7.3721e-14
c115027_g1	2.1544	9.3692e-05	0.0052748
c121709_g4	2.159	1.2048e-07	1.363e-05
c69978_g1	2.1591	1.7604e-09	2.7384e-07
c88788_g1	2.1591	0.0011991	0.044673
c112967_g1	2.1593	3.2939e-07	3.4266e-05
c110608_g1	2.1628	9.0907e-13	2.3761e-10
c77106_g1	2.1635	0.00034932	0.016083
c58091_g1	2.1666	4.2857e-06	0.00034293
c124924_g2	2.1673	4.2165e-07	4.2718e-05
c112660_g4	2.1683	7.2939e-05	0.0042693
c109068_g1	2.1704	1.5061e-11	3.2916e-09
c114384_g1	2.1728	0.0012734	0.046919
c120026_g4	2.1738	2.9822e-05	0.001938
c12616_g1	2.1787	1.3793e-06	0.00012426
c76950_g1	2.1806	1.1815e-05	0.00084596
c126337_g1	2.1822	3.3192e-06	0.00027333
c110605_g1	2.1832	3.9803e-17	1.8386e-14
c88114_g2	2.1835	4.9965e-05	0.0030632
c84506_g1	2.1835	0.00070549	0.028828
c116054_g1	2.1838	7.0199e-11	1.387e-08
c115195_g1	2.1878	3.594e-08	4.4427e-06
c122048_g2	2.188	7.3214e-12	1.6886e-09
c111308_g1	2.1882	9.0369e-06	0.00066609
c26580_g1	2.1886	1.2886e-05	0.00091127
c113297_g2	2.2002	3.5511e-06	0.00029085
c122691_g4	2.2008	1.1116e-16	4.7531e-14
c121940_g2	2.2029	1.2369e-17	6.0309e-15
c116011_g2	2.2033	1.4476e-05	0.0010126
c21396_g1	2.2048	0.00029394	0.013875
c123849_g2	2.2054	0.00021434	0.010709
c118283_g2	2.2057	1.8285e-10	3.3655e-08
c107637_g1	2.2062	2.2925e-10	4.1689e-08
c113946_g1	2.2093	3.1249e-16	1.271e-13
c103094_g1	2.2097	0.00010739	0.0059418
c14027_g1	2.2127	0.00015066	0.0079302
c120809_g1	2.2141	0.0010945	0.041539
c894_g1	2.2154	1.0481e-05	0.00075939
c110190_g1	2.216	3.0931e-14	9.878e-12
c108956_g1	2.2194	1.4255e-05	0.00099963
c121245_g4	2.2207	9.0827e-06	0.00066899
c115424_g1	2.2212	5.6702e-09	8.1093e-07
c121986_g5	2.2222	4.0263e-17	1.8496e-14
c115856_g1	2.2222	5.9432e-10	9.9806e-08
c115371_g3	2.2232	0.0001937	0.0098267
c105843_g1	2.224	4.1932e-07	4.2559e-05
c115995_g1	2.2277	1.2676e-05	0.00089911
c126268_g4	2.228	0.00018026	0.0092574
c121480_g1	2.2285	1.1842e-05	0.00084715
c98613_g1	2.2329	0.0012905	0.047401
c117738_g1	2.2365	1.1637e-09	1.8659e-07
c111463_g5	2.2374	2.4901e-08	3.1956e-06
c104105_g2	2.2388	1.5915e-09	2.4896e-07
c102726_g2	2.2391	0.0011748	0.043983
c125293_g2	2.2414	0.00042586	0.018932
c112376_g1	2.2482	1.3419e-11	2.9678e-09
c120150_g1	2.2507	4.487e-06	0.0003575
c28637_g1	2.2536	0.00033395	0.015478
c125418_g1	2.2545	6.378e-18	3.2625e-15
c110862_g1	2.2569	6.9514e-14	2.1309e-11
c117873_g2	2.2587	2.9513e-06	0.00024571
c122674_g2	2.2627	5.4547e-09	7.8146e-07
c125350_g2	2.2643	1.4031e-11	3.0908e-09
c123973_g1	2.2653	1.0464e-14	3.5467e-12
c122371_g2	2.2654	0.00063377	0.026474
c100427_g1	2.2673	0.0010325	0.039617
c122720_g2	2.2679	6.0782e-05	0.003646
c97515_g1	2.2693	4.0757e-12	9.6541e-10
c111124_g3	2.2707	4.2962e-13	1.1803e-10
c119094_g5	2.2727	4.8091e-05	0.0029625
c110697_g3	2.273	0.00011096	0.0061046
c113743_g2	2.275	1.8379e-09	2.8444e-07
c109719_g2	2.2752	1.4902e-15	5.5344e-13
c116930_g1	2.2761	0.00018091	0.0092883
c107422_g1	2.2767	1.6519e-07	1.8123e-05
c39410_g1	2.2782	2.5092e-13	7.1649e-11
c123773_g3	2.2783	2.2492e-11	4.7598e-09
c76761_g2	2.279	3.4519e-10	6.1237e-08
c110037_g1	2.2798	5.0143e-08	6.0548e-06
c68580_g1	2.2806	0.0013283	0.048505
c123016_g4	2.2808	0.00016273	0.0084829
c664_g1	2.2889	0.00048391	0.021169
c165283_g1	2.2893	6.2507e-08	7.3926e-06
c116997_g1	2.2894	1.3357e-05	0.00094184
c96859_g2	2.2917	0.00042781	0.019014
c104794_g1	2.292	0.0012039	0.044823
c113710_g1	2.2957	2.3459e-08	3.0255e-06
c96636_g1	2.2966	0.00058188	0.024671
c95844_g1	2.2968	1.0094e-07	1.156e-05
c110830_g1	2.2974	9.239e-17	3.9914e-14
c121744_g3	2.2975	5.4853e-08	6.5524e-06
c107107_g1	2.2982	7.6255e-07	7.2955e-05
c113297_g5	2.2993	6.1681e-08	7.3052e-06
c118313_g1	2.3	4.1709e-17	1.9055e-14
c122231_g3	2.3021	0.00034742	0.016008
c123461_g2	2.3035	1.0167e-08	1.3841e-06
c111561_g1	2.3044	2.9982e-05	0.001947
c113004_g9	2.3057	7.6082e-12	1.75e-09
c118189_g2	2.3081	8.4635e-06	0.00062866
c84637_g1	2.3122	2.7351e-18	1.4572e-15
c118185_g1	2.3145	8.8706e-06	0.0006554
c108171_g1	2.3168	0.00021343	0.010679
c125443_g1	2.317	3.208e-18	1.6983e-15
c115265_g3	2.3173	1.0649e-18	5.9381e-16
c70735_g1	2.3207	3.5416e-05	0.0022542
c123159_g1	2.3228	1.9534e-17	9.2541e-15
c112476_g1	2.3254	1.17e-18	6.4819e-16
c44362_g1	2.3267	0.00050334	0.021869
c113622_g6	2.3282	0.0010149	0.039079
c110562_g1	2.3299	5.1371e-13	1.3975e-10
c107529_g1	2.3349	7.3133e-06	0.00055133
c125575_g1	2.3353	3.0258e-19	1.802e-16
c115273_g1	2.3429	0.0012157	0.045139
c115699_g1	2.3459	1.34e-10	2.5277e-08
c125964_g2	2.3492	6.4863e-10	1.0752e-07
c123878_g1	2.3499	1.0136e-11	2.284e-09
c112871_g1	2.3558	2.8149e-06	0.00023577
c104387_g1	2.3559	9.4817e-05	0.0053273
c101914_g2	2.3568	0.00019548	0.0098901
c106835_g1	2.358	5.0107e-10	8.5612e-08
c49726_g1	2.3637	6.1658e-05	0.0036932
c120633_g1	2.3664	5.7118e-10	9.6308e-08
c122205_g1	2.377	0.00056389	0.024055
c120943_g1	2.378	9.6498e-19	5.4181e-16
c122177_g1	2.3833	6.7614e-19	3.8614e-16
c122961_g4	2.3837	9.0533e-16	3.4626e-13
c101731_g2	2.3886	4.0943e-07	4.1708e-05
c112130_g1	2.3887	3.6017e-06	0.00029456
c56838_g1	2.3889	0.00073735	0.029909
c76597_g1	2.391	6.9939e-05	0.0041167
c114252_g1	2.3917	6.9143e-11	1.3677e-08
c92263_g1	2.3921	0.00072688	0.029578
c51049_g1	2.3933	1.408e-11	3.0976e-09
c115577_g7	2.3963	1.4516e-06	0.00012979
c118495_g1	2.3965	1.085e-15	4.1097e-13
c125704_g1	2.399	2.6604e-06	0.00022406
c106376_g1	2.4001	9.6997e-20	6.013e-17
c120169_g1	2.4021	1.5997e-06	0.00014159
c124116_g2	2.404	9.4573e-20	5.8846e-17
c119443_g2	2.4058	6.4205e-07	6.2393e-05
c68693_g1	2.4063	0.00076891	0.031001
c92359_g1	2.4065	0.00037755	0.017155
c71810_g1	2.4087	2.5692e-08	3.283e-06
c85707_g1	2.4116	1.34e-20	9.3497e-18
c120188_g1	2.4117	1.3084e-15	4.881e-13
c102254_g1	2.4133	7.0315e-07	6.7777e-05
c93168_g1	2.4231	2.3768e-06	0.00020273
c124656_g1	2.4253	0.00055087	0.023609
c117118_g2	2.4259	1.156e-13	3.4423e-11
c122435_g1	2.4284	3.0711e-16	1.2552e-13
c117575_g2	2.4293	0.0011625	0.043612
c54878_g1	2.4295	0.00018677	0.0095364
c113157_g2	2.4316	0.00019687	0.0099527
c116820_g8	2.4323	1.5344e-09	2.4093e-07
c101122_g1	2.4327	6.1224e-08	7.2563e-06
c107056_g1	2.4349	4.4573e-08	5.4334e-06
c123658_g1	2.4375	1.0547e-11	2.3702e-09
c81030_g1	2.4381	1.2608e-05	0.00089468
c113115_g1	2.4386	3.2045e-19	1.8949e-16
c122336_g1	2.4414	3.4466e-14	1.0927e-11
c104655_g1	2.4448	0.00019311	0.009806
c115123_g2	2.4486	2.2248e-20	1.484e-17
c120013_g1	2.4503	2.3108e-06	0.00019761
c107775_g1	2.4508	2.3253e-10	4.2241e-08
c91788_g1	2.452	0.00037177	0.016943
c71509_g1	2.4558	4.5447e-10	7.8943e-08
c110862_g2	2.4564	7.2978e-11	1.4368e-08
c126351_g1	2.4572	6.2154e-16	2.4387e-13
c90815_g2	2.4643	0.00072388	0.029485
c122488_g1	2.4651	4.8638e-12	1.1424e-09
c101021_g2	2.4682	6.1785e-10	1.0334e-07
c107379_g1	2.4725	5.999e-10	1.0064e-07
c124389_g2	2.4774	2.2446e-06	0.00019254
c120602_g1	2.4809	8.2212e-12	1.8806e-09
c121830_g1	2.4827	1.4859e-21	1.197e-18
c118631_g2	2.4839	7.7347e-06	0.00058074
c109506_g1	2.4856	0.00017916	0.0092155
c118049_g1	2.486	1.5027e-09	2.3662e-07
c85685_g2	2.4865	6.4628e-07	6.2767e-05
c123619_g3	2.4872	3.098e-14	9.878e-12
c116804_g2	2.493	0.00025314	0.012263
c94802_g1	2.4938	0.0010081	0.038842
c14263_g1	2.4944	1.7601e-12	4.4135e-10
c180042_g1	2.4958	4.664e-08	5.6647e-06
c94756_g1	2.4972	0.00043949	0.019466
c117764_g1	2.4978	3.2268e-09	4.7916e-07
c64308_g1	2.4982	0.0012095	0.044961
c123045_g1	2.5043	4.3186e-05	0.0026848
c235890_g1	2.5056	8.5513e-05	0.0048902
c122306_g4	2.5076	0.0011898	0.044426
c114693_g1	2.5079	1.1099e-09	1.7814e-07
c123016_g3	2.5092	8.1201e-10	1.3347e-07
c255947_g1	2.5102	1.3406e-09	2.121e-07
c118540_g1	2.5104	3.6614e-16	1.4677e-13
c110886_g1	2.5119	6.334e-10	1.0537e-07
c113019_g2	2.5144	1.418e-07	1.5838e-05
c111359_g1	2.5154	1.8004e-15	6.5695e-13
c122177_g4	2.5187	3.3776e-21	2.5602e-18
c112212_g5	2.5194	1.9442e-11	4.1554e-09
c105190_g1	2.5203	0.00032803	0.015242
c109148_g1	2.522	6.5869e-10	1.0907e-07
c117869_g2	2.522	2.273e-07	2.4392e-05
c102145_g1	2.5241	8.1262e-17	3.5661e-14
c101173_g4	2.5288	2.5976e-07	2.7678e-05
c102202_g1	2.5296	2.5486e-05	0.0016785
c67909_g2	2.5305	9.8666e-05	0.0055102
c124283_g1	2.531	2.3895e-08	3.0769e-06
c110545_g1	2.5325	5.061e-14	1.5805e-11
c96284_g1	2.5337	8.4824e-06	0.00062978
c74107_g1	2.5356	0.00039364	0.017762
c110503_g1	2.5374	1.8099e-14	5.9413e-12
c117984_g4	2.5401	4.8676e-10	8.3594e-08
c77435_g1	2.5413	0.00036601	0.016721
c95423_g2	2.5496	7.8e-09	1.0812e-06
c84710_g1	2.5509	2.0345e-17	9.5836e-15
c108531_g1	2.553	3.5909e-08	4.4421e-06
c106376_g2	2.5546	3.1278e-08	3.9129e-06
c95943_g1	2.5548	3.4798e-05	0.0022233
c30392_g1	2.5587	0.00080892	0.032302
c115761_g1	2.5655	1.6336e-10	3.037e-08
c116804_g1	2.5667	2.0785e-21	1.6349e-18
c200629_g1	2.5703	3.2332e-06	0.00026704
c122415_g1	2.5704	2.6377e-10	4.7707e-08
c86657_g1	2.5712	5.1013e-05	0.0031195
c125346_g1	2.5756	1.984e-06	0.00017177
c126433_g3	2.5788	0.00017783	0.009161
c201499_g1	2.582	4.6784e-10	8.0929e-08
c113056_g1	2.5825	5.8946e-08	7.0061e-06
c86502_g1	2.583	1.6692e-13	4.8919e-11
c102268_g1	2.5834	3.787e-05	0.0023939
c116158_g3	2.585	4.0705e-07	4.1491e-05
c102637_g1	2.5878	2.7077e-05	0.0017763
c119665_g2	2.5889	9.2208e-11	1.7797e-08
c122300_g3	2.5908	1.5183e-07	1.6834e-05
c19801_g1	2.5985	0.00039981	0.017974
c125639_g2	2.5988	3.417e-05	0.0021865
c128773_g1	2.6089	1.0847e-05	0.00078209
c124344_g1	2.6132	2.2145e-05	0.0014801
c112089_g2	2.6137	1.6731e-07	1.831e-05
c124283_g5	2.6197	2.7633e-05	0.0018071
c120372_g2	2.62	1.6082e-05	0.0011133
c102204_g1	2.6214	4.226e-06	0.00033864
c121241_g1	2.6239	5.7216e-07	5.6191e-05
c118535_g4	2.6246	6.5987e-05	0.0039201
c104949_g2	2.6253	4.3058e-09	6.2709e-07
c123783_g6	2.6267	0.00056852	0.024197
c119490_g3	2.6309	3.8607e-16	1.5439e-13
c122541_g4	2.6312	9.183e-06	0.00067549
c123075_g3	2.634	2.5955e-07	2.7674e-05
c118091_g1	2.634	1.1007e-06	0.00010119
c101038_g1	2.6349	8.1855e-08	9.5135e-06
c119318_g1	2.6379	4.1507e-05	0.0026001
c123200_g1	2.6404	6.8607e-18	3.4987e-15
c107374_g3	2.6411	3.189e-05	0.0020588
c112463_g2	2.6429	0.0011944	0.044543
c134429_g1	2.643	0.00091294	0.03577
c100146_g2	2.6541	5.5191e-05	0.0033431
c120145_g1	2.6562	1.7578e-15	6.4282e-13
c107707_g1	2.6596	0.0004631	0.02036
c122791_g1	2.6614	8.3775e-06	0.00062366
c120988_g14	2.6622	0.00034081	0.015752
c121051_g1	2.6624	7.9147e-12	1.8145e-09
c110735_g5	2.6626	2.2614e-07	2.4282e-05
c109857_g1	2.6672	3.7593e-05	0.0023809
c95514_g1	2.6743	3.1084e-13	8.7855e-11
c116861_g1	2.6764	2.7597e-11	5.7814e-09
c105358_g1	2.6782	4.1997e-09	6.1324e-07
c109847_g1	2.6842	1.0801e-15	4.1027e-13
c48941_g1	2.6861	0.00043053	0.019104
c105828_g1	2.6893	0.00021689	0.010799
c117501_g1	2.6908	2.3608e-13	6.7642e-11
c75431_g1	2.6914	3.8715e-06	0.00031371
c125193_g1	2.6942	3.2143e-08	4.012e-06
c14835_g1	2.6945	0.0001852	0.0094732
c73532_g1	2.6949	1.0225e-05	0.00074298
c93875_g1	2.6949	0.0006311	0.02637
c125569_g2	2.6952	0.0008259	0.032909
c108629_g1	2.6969	3.4743e-08	4.3107e-06
c89869_g1	2.6985	4.0047e-05	0.0025191
c97488_g1	2.7042	5.3684e-05	0.0032637
c120233_g2	2.7114	0.00056104	0.023958
c124839_g2	2.7162	2.8768e-13	8.1585e-11
c123276_g1	2.7176	1.3654e-17	6.619e-15
c114483_g1	2.7197	7.0368e-19	4.0049e-16
c126379_g1	2.7236	1.2599e-10	2.3876e-08
c116256_g1	2.25797	6.7263e-07	6.5062e-05
c77132_g1	2.7254	9.0811e-16	3.4653e-13
c97826_g1	2.7331	0.00015571	0.0081498
c107064_g1	2.7352	0.00024211	0.011826
c109123_g1	2.7363	2.2406e-15	8.105e-13
c1115_g1	2.7399	0.00067491	0.027796
c114420_g1	2.7452	3.8912e-06	0.00031499
c108147_g1	2.7473	1.6417e-10	3.0462e-08
c107374_g2	2.7503	7.4877e-12	1.7246e-09
c100564_g1	2.7503	0.0013488	0.04913
c115265_g1	2.7566	0.00028788	0.01365
c110224_g2	2.7568	1.5316e-08	2.0383e-06
c124284_g5	2.7577	1.55e-15	5.7183e-13
c114923_g2	2.7585	2.167e-16	9.034e-14
c118127_g1	2.7594	3.1685e-15	1.1194e-12
c120414_g1	2.7649	6.2681e-22	5.279e-19
c35738_g1	2.7666	0.00011951	0.0064937
c100992_g1	2.7667	3.9223e-09	5.7678e-07
c106477_g1	2.769	0.0012046	0.044829
c117197_g2	2.7699	9.7792e-09	1.3334e-06
c109998_g1	2.7709	9.66e-13	2.5052e-10
c177892_g1	2.7713	0.0011144	0.042218
c225676_g1	2.773	2.7942e-06	0.00023426
c90973_g2	2.7761	3.7356e-05	0.0023677
c121567_g2	2.7807	7.5149e-08	8.7942e-06
c110500_g1	2.7854	0.0010705	0.040803
c112495_g1	2.7859	0.00012561	0.0067763
c26605_g1	2.7871	0.00041728	0.01863
c104067_g1	2.7874	0.00068134	0.028031
c100341_g1	2.7893	0.00035556	0.016329
c28814_g1	2.79	2.4918e-05	0.0016496
c119930_g1	2.791	1.9974e-25	2.8714e-22
c37707_g1	2.793	9.5357e-18	4.7467e-15
c115754_g1	2.797	1.6184e-23	1.7081e-20
c107418_g1	2.7978	6.1576e-07	6.0083e-05
c115503_g4	2.7979	0.00056275	0.024019
c78752_g3	2.798	0.0001321	0.0070855
c68469_g1	2.7997	3.4936e-05	0.0022287
c124116_g3	2.8029	4.3699e-05	0.002713
c45497_g1	2.8102	0.0012532	0.046316
c128796_g1	2.8105	4.0467e-09	5.935e-07
c123640_g1	2.8134	3.0086e-05	0.0019529
c51954_g1	2.8135	2.0658e-05	0.0013907
c109257_g1	2.8155	5.9097e-26	9.297e-23
c97446_g1	2.8172	1.9908e-07	2.1586e-05
c119830_g1	2.8208	2.3201e-05	0.0015451
c108911_g1	2.8241	2.2377e-08	2.8949e-06
c119222_g1	2.8288	5.0946e-06	0.00040112
c114695_g3	2.8337	1.6355e-11	3.5374e-09
c108642_g1	2.8354	1.1119e-10	2.124e-08
c141620_g1	2.8409	2.5334e-05	0.0016718
c99827_g1	2.8425	4.3035e-09	6.2709e-07
c102036_g1	2.8427	9.2291e-18	4.6356e-15
c123812_g2	2.8487	3.5323e-23	3.5484e-20
c125089_g3	2.8524	7.4548e-14	2.2727e-11
c126260_g1	2.8585	5.6941e-23	5.3646e-20
c202811_g1	2.8587	0.0002877	0.013645
c36531_g1	1.68099	1.2126e-06	0.00011044
c119799_g1	2.8601	0.00011353	0.0062151
c86521_g1	2.8603	1.3581e-05	0.00095637
c114693_g3	2.8618	0.00037853	0.01719
c108209_g1	2.8626	0.00050511	0.021919
c119490_g1	2.8663	0.00028578	0.013573
c106731_g1	2.8694	0.0005003	0.02176
c121120_g1	2.8694	0.0005003	0.02176
c153766_g1	2.8701	7.9934e-05	0.0046171
c126388_g4	2.8724	2.8332e-07	2.994e-05
c94115_g1	2.8736	1.7568e-26	2.8721e-23
c107335_g1	2.8759	0.00026266	0.012649
c69684_g1	2.8816	0.0006164	0.025822
c70959_g1	2.8824	1.333e-08	1.7898e-06
c124116_g1	2.8857	1.0781e-13	3.2334e-11
c101688_g1	2.8911	3.0835e-23	3.1163e-20
c114518_g2	2.8925	0.0012812	0.047154
c125785_g2	2.8995	1.9978e-05	0.001351
c60757_g2	2.9007	3.3998e-08	4.2309e-06
c51998_g1	2.901	1.4412e-05	0.0010085
c110970_g1	2.904	7.1256e-12	1.6458e-09
c117984_g1	2.9104	2.4079e-22	2.1023e-19
c119738_g7	2.9106	9.4503e-10	1.539e-07
c56085_g1	2.9174	6.7407e-25	8.7002e-22
c116149_g1	2.9197	9.9324e-07	9.2686e-05
c112167_g4	2.9245	0.00080773	0.032277
c16381_g1	2.9246	0.00099675	0.03852
c115957_g2	2.9267	3.5757e-17	1.6563e-14
c109644_g1	2.9289	5.542e-07	5.475e-05
c99484_g1	2.9341	6.5413e-11	1.3048e-08
c101816_g3	2.937	5.5159e-17	2.4726e-14
c113275_g1	2.9431	1.5711e-10	2.9306e-08
c24295_g1	2.9461	2.8092e-06	0.00023541
c105622_g2	2.9556	1.5675e-05	0.00109
c123756_g3	2.9644	0.00028289	0.013459
c116752_g3	2.9681	6.2234e-29	1.2504e-25
c96790_g1	2.9704	1.2841e-06	0.00011631
c105569_g1	2.973	6.593e-06	0.00050502
c114270_g2	2.9831	8.0108e-06	0.00059931
c123382_g3	2.9846	1.0589e-06	9.7985e-05
c121270_g3	2.57773	6.4669e-22	5.4096e-19
c114636_g2	2.9921	2.7816e-07	2.9432e-05
c117518_g1	3.0003	5.0823e-14	1.5841e-11
c88671_g1	3.0024	1.5128e-19	9.1732e-17
c116813_g3	3.0044	6.6962e-06	0.00051152
c112733_g1	3.0103	7.1483e-09	1.0051e-06
c104307_g2	3.0107	4.1508e-11	8.4721e-09
c117357_g1	3.0147	8.646e-07	8.1827e-05
c125963_g2	3.0149	2.049e-09	3.1375e-07
c103707_g2	3.0182	0.00011036	0.0060799
c34682_g1	3.0195	0.00011304	0.0061925
c89389_g1	3.0201	1.734e-06	0.00015219
c75907_g1	3.023	3.7194e-24	4.3989e-21
c117951_g1	3.0251	1.1173e-07	1.2726e-05
c115265_g2	3.0275	5.2864e-29	1.0883e-25
c257156_g1	3.0278	1.7611e-05	0.001209
c77562_g1	3.0299	0.0003636	0.01663
c37697_g1	3.0332	5.4348e-05	0.0033004
c89413_g2	3.0343	8.2068e-11	1.595e-08
c120649_g1	3.0389	8.8355e-05	0.0050344
c118339_g2	3.0396	9.1089e-22	7.5197e-19
c123671_g1	3.0541	1.7483e-17	8.3535e-15
c120802_g1	3.0612	4.2814e-25	5.7117e-22
c119566_g1	3.0637	2.7976e-08	3.5476e-06
c126326_g1	3.0679	0.0012744	0.046943
c226200_g1	3.0704	3.6619e-05	0.0023263
c112735_g3	3.075	7.5423e-07	7.2242e-05
c123638_g1	3.0773	3.9162e-05	0.0024681
c107625_g1	3.0801	0.001168	0.043759
c125443_g2	3.0852	1.7285e-13	5.048e-11
c119799_g2	3.0863	0.0011832	0.044221
c116927_g3	3.0866	3.7197e-07	3.8172e-05
c117007_g2	3.0892	0.00030915	0.014485
c123613_g3	3.091	1.2657e-23	1.3795e-20
c91770_g1	3.1007	6.7814e-07	6.5556e-05
c123118_g6	3.121	4.1335e-06	0.00033171
c123002_g1	3.123	2.7e-13	7.6703e-11
c118675_g3	3.1231	1.2079e-06	0.00011007
c119038_g2	3.1259	1.2529e-27	2.296e-24
c117118_g1	3.1291	0.00058565	0.024806
c101161_g1	3.1295	1.6512e-08	2.1819e-06
c105344_g1	3.1313	2.7352e-06	0.00022966
c122106_g3	3.132	6.655e-07	6.4409e-05
c120818_g1	3.1329	2.9391e-26	4.7127e-23
c123012_g2	2.9912	3.5469e-13	9.8907e-11
c84992_g1	3.136	4.2241e-09	6.1628e-07
c185121_g1	3.137	8.2514e-06	0.0006151
c76439_g1	3.1378	1.9666e-06	0.00017063
c101616_g1	3.1381	0.00025616	0.012385
c54116_g1	3.1382	0.00067441	0.027783
c119475_g4	3.1449	1.3185e-10	2.4928e-08
c92261_g1	3.1478	7.9859e-17	3.5137e-14
c111272_g1	3.148	9.6447e-22	7.9228e-19
c106391_g1	3.1482	4.8458e-05	0.0029829
c126468_g1	3.1505	3.887e-21	2.9197e-18
c123080_g1	3.155	1.2131e-22	1.1054e-19
c111057_g1	3.1567	4.303e-08	5.2684e-06
c112046_g1	3.1569	9.6199e-10	1.5635e-07
c107535_g1	3.1572	7.2845e-18	3.6922e-15
c114764_g1	3.1635	1.6585e-09	2.5847e-07
c123783_g3	3.1641	0.00075333	0.030491
c86117_g1	3.1643	0.00042936	0.019073
c226039_g1	3.1653	4.3305e-11	8.8174e-09
c118339_g1	3.1663	3.1927e-29	6.8256e-26
c15964_g1	3.1682	5.7334e-05	0.0034541
c59382_g1	3.1709	1.0259e-06	9.563e-05
c93365_g1	3.1727	0.00015254	0.0080065
c105356_g1	3.1728	2.4514e-05	0.0016261
c104403_g1	3.18	4.1766e-09	6.1041e-07
c64073_g1	3.1834	0.00010772	0.0059581
c111093_g2	3.184	5.7816e-06	0.00044885
c35391_g1	3.1852	0.0005137	0.022267
c78760_g1	3.1882	5.4437e-05	0.0033046
c111484_g1	3.1888	5.3846e-05	0.0032723
c115016_g1	3.1951	7.4953e-20	4.7166e-17
c112479_g2	3.1951	2.8945e-06	0.00024146
c101196_g1	3.2005	2.3261e-05	0.0015485
c114693_g7	3.2316	0.00044309	0.019604
c93822_g2	3.2321	7.9308e-07	7.5572e-05
c124274_g1	3.2335	4.2358e-25	5.6964e-22
c107045_g1	3.2337	0.001151	0.043249
c126294_g1	3.234	7.175e-20	4.5667e-17
c123944_g4	3.234	0.00011806	0.0064273
c122541_g5	3.2397	4.1558e-10	7.2643e-08
c95423_g1	3.2466	0.00093899	0.036618
c123741_g1	3.2493	3.4476e-11	7.1328e-09
c97144_g1	3.2613	1.021e-23	1.1351e-20
c121574_g7	3.2626	1.2371e-05	0.00087931
c41029_g1	3.2637	5.4338e-13	1.4734e-10
c80832_g1	3.2645	2.5546e-15	9.1221e-13
c13466_g1	3.2648	4.0551e-06	0.00032589
c120450_g2	3.2693	3.8364e-05	0.0024215
c34144_g1	3.273	0.00028633	0.013589
c257961_g1	3.2782	3.1797e-16	1.2901e-13
c114566_g1	3.2788	1.2541e-16	5.3349e-14
c105730_g2	3.2797	2.1126e-07	2.2802e-05
c123603_g4	3.2824	9.0094e-34	2.5464e-30
c126260_g2	3.2885	3.5231e-13	9.841e-11
c94873_g1	3.2887	8.3626e-08	9.6775e-06
c17341_g1	3.2895	0.00039377	0.017762
c249353_g1	3.2921	0.00075094	0.030411
c98803_g1	3.2934	6.5083e-06	0.00049922
c109080_g2	3.2964	7.7632e-05	0.0045044
c183712_g1	3.2964	0.00043103	0.019121
c114107_g4	3.2972	1.7742e-12	4.4424e-10
c114367_g3	3.2979	2.2805e-09	3.4793e-07
c115777_g2	3.3012	1.3982e-05	0.00098169
c108297_g3	3.304	5.7085e-07	5.6095e-05
c122119_g1	3.306	2.1233e-11	4.5105e-09
c112785_g4	3.3062	0.00018187	0.0093315
c123500_g1	3.3066	0.00027722	0.013231
c98929_g1	3.308	1.329e-07	1.494e-05
c112512_g2	3.3087	2.0125e-20	1.3642e-17
c154330_g1	3.3101	0.0013238	0.048399
c84350_g1	3.3108	9.5026e-06	0.00069654
c124839_g1	3.311	1.7117e-13	5.0077e-11
c101816_g2	3.3138	7.6402e-05	0.004447
c124284_g2	3.3163	2.5781e-34	8.1117e-31
c124956_g1	3.3195	4.5665e-10	7.924e-08
c107071_g1	3.3234	1.9992e-05	0.0013513
c125444_g2	3.3317	1.1432e-13	3.4105e-11
c93018_g1	3.3396	0.00061761	0.025858
c106599_g1	3.3408	4.5727e-06	0.0003638
c60941_g1	3.3418	2.6809e-12	6.5168e-10
c54533_g2	3.3445	0.00019357	0.0098233
c106541_g1	3.3544	1.2142e-07	1.3718e-05
c120486_g1	3.3592	2.8093e-05	0.001835
c123603_g5	3.3608	2.6641e-11	5.5952e-09
c121830_g3	3.3633	0.00015938	0.0083187
c102815_g1	3.3652	0.00060273	0.025358
c115278_g1	3.3684	2.575e-33	6.9607e-30
c116420_g2	3.369	3.7263e-07	3.8216e-05
c73078_g1	3.3713	0.00012849	0.006914
c121105_g2	3.3735	9.9767e-05	0.0055679
c111966_g2	3.3764	3.0126e-20	1.9701e-17
c111462_g1	3.3792	4.5205e-15	1.5837e-12
c85041_g1	3.3832	1.205e-05	0.00085982
c119074_g1	3.3868	1.3974e-30	3.2364e-27
c231583_g1	3.3891	1.404e-05	0.0009854
c123421_g2	3.3905	3.3748e-29	7.1236e-26
c125889_g3	3.3908	6.8232e-05	0.0040291
c3834_g1	3.3986	0.0001859	0.0095007
c120349_g1	3.3993	1.386e-09	2.1867e-07
c117657_g2	3.4008	4.5366e-34	1.3755e-30
c216541_g1	3.4039	1.6566e-08	2.1855e-06
c122068_g3	3.4044	2.2033e-31	5.3249e-28
c48759_g1	3.4082	3.2674e-07	3.4033e-05
c115129_g2	3.419	0.00010158	0.0056566
c117950_g1	3.4244	1.6039e-12	4.0464e-10
c121575_g2	3.4244	1.7829e-05	0.0012215
c85887_g1	3.426	0.00019093	0.0097131
c120934_g2	3.4361	5.5933e-07	5.5086e-05
c113712_g2	3.4369	3.4366e-10	6.1031e-08
c122084_g2	3.4429	6.9573e-05	0.0041025
c37377_g1	3.4482	4.5837e-07	4.6073e-05
c118883_g1	3.4532	0.00051895	0.02245
c101672_g3	3.4618	0.00085868	0.034004
c85861_g1	3.4634	7.9213e-12	1.8145e-09
c111537_g10	3.4652	1.7489e-16	7.3833e-14
c112105_g1	3.4694	2.9448e-06	0.00024532
c5374_g1	3.4759	2.6606e-12	6.477e-10
c102261_g1	3.48	0.00018013	0.0092566
c122718_g3	3.4821	7.3851e-17	3.258e-14
c98301_g1	3.4921	3.549e-12	8.4667e-10
c120204_g1	3.4957	1.0388e-34	3.3967e-31
c26017_g1	3.5014	4.2921e-10	7.4867e-08
c16377_g1	3.5091	9.7717e-30	2.1162e-26
c126114_g2	3.5174	1.5749e-08	2.0926e-06
c52947_g1	3.5185	1.9491e-25	2.8263e-22
c116252_g1	3.5256	2.4135e-18	1.2899e-15
c123963_g1	3.5257	1.762e-17	8.3951e-15
c90431_g1	3.5314	2.7178e-08	3.4543e-06
c78752_g2	3.5321	9.1148e-07	8.5728e-05
c83126_g1	3.5402	0.00017757	0.0091535
c30486_g1	3.5424	7.6442e-11	1.4944e-08
c29505_g1	3.5425	5.582e-07	5.5026e-05
c124476_g1	3.5429	1.45e-38	5.4953e-35
c125404_g3	3.5476	4.3083e-17	1.9576e-14
c121762_g1	3.567	0.00011014	0.0060718
c123603_g1	3.5708	6.3461e-34	1.8898e-30
c117225_g7	3.5727	4.2647e-15	1.4972e-12
c74476_g1	3.579	3.9563e-06	0.00031949
c84980_g2	3.5797	1.6139e-07	1.7753e-05
c115818_g1	3.5819	4.8869e-06	0.00038622
c94161_g1	3.5873	3.0333e-12	7.3202e-10
c109545_g15	3.596	9.3643e-11	1.8053e-08
c102053_g1	3.5977	1.8158e-24	2.2103e-21
c43325_g1	3.5983	1.7377e-11	3.739e-09
c110166_g1	3.5995	2.0099e-08	2.6287e-06
c117893_g2	3.6059	9.3791e-18	4.6827e-15
c117527_g1	3.615	3.0745e-34	9.4943e-31
c69849_g1	3.6223	1.5721e-05	0.0010928
c111975_g3	3.6271	0.00010813	0.0059764
c123812_g1	3.6362	5.4848e-22	4.6664e-19
c110412_g1	3.638	9.6775e-05	0.0054262
c12323_g1	3.6406	3.4569e-12	8.2588e-10
c77026_g1	3.6417	5.1423e-06	0.0004041
c92384_g1	3.6432	7.4177e-28	1.4056e-24
c61431_g1	3.6465	1.5376e-05	0.0010701
c17738_g1	3.6468	4.1468e-07	4.214e-05
c124012_g1	3.647	1.1911e-05	0.00085134
c74276_g1	3.6498	5.4666e-05	0.0033161
c96294_g1	3.6501	2.2854e-09	3.4836e-07
c122249_g2	3.6561	0.00013354	0.0071512
c104560_g1	3.6604	7.8078e-10	1.2853e-07
c76489_g1	3.6676	1.4477e-07	1.6128e-05
c54533_g3	3.6718	5.6544e-05	0.0034139
c119144_g1	3.6731	7.2581e-05	0.0042557
c117970_g4	3.6804	3.6984e-10	6.5124e-08
c64342_g1	3.6866	7.1142e-06	0.000539
c52228_g1	3.6934	1.9546e-13	5.6587e-11
c121072_g4	3.7011	2.3896e-06	0.00020368
c116813_g1	3.7061	2.6096e-25	3.6568e-22
c91485_g2	3.7168	5.6822e-06	0.00044236
c32346_g1	3.7185	0.00010399	0.0057707
c104134_g1	3.7192	0.00010258	0.005704
c96993_g1	3.721	1.683e-07	1.8403e-05
c70752_g1	3.7234	1.2381e-10	2.3488e-08
c110428_g3	3.7275	2.4928e-08	3.1956e-06
c57423_g1	3.7312	0.0009534	0.037094
c68044_g1	3.7362	0.00040461	0.018142
c108664_g9	3.739	1.2181e-21	9.9089e-19
c114739_g1	3.7395	8.2005e-27	1.3813e-23
c117764_g2	3.7419	4.8591e-19	2.8431e-16
c120597_g1	3.744	0.00027328	0.013076
c90590_g1	3.7458	0.00044538	0.01968
c104189_g2	3.7593	0.0003436	0.01585
c121627_g1	3.7633	6.4432e-40	2.6861e-36
c14354_g1	3.7741	5.8312e-10	9.8122e-08
c119039_g1	3.7773	1.3075e-05	0.00092388
c116181_g2	3.7782	1.257e-06	0.00011405
c106161_g1	3.7857	1.1578e-23	1.2786e-20
c115063_g4	3.7927	5.0461e-08	6.0807e-06
c102963_g1	3.8161	2.6944e-08	3.4299e-06
c120876_g4	3.8172	0.00019347	0.0098212
c90037_g1	3.8189	9.4527e-06	0.00069349
c105410_g1	3.8237	0.00014486	0.0076541
c111786_g1	3.8268	5.8954e-13	1.5933e-10
c108657_g1	3.8321	1.9353e-19	1.1651e-16
c116880_g4	3.8466	0.00023831	0.011678
c94720_g1	3.8524	2.2832e-07	2.4469e-05
c100122_g2	3.8525	9.0841e-12	2.0554e-09
c123075_g2	3.8592	0.00013271	0.0071133
c97243_g1	3.8618	0.00036053	0.016526
c97464_g1	3.8794	4.1134e-21	3.076e-18
c122106_g1	3.8806	2.588e-33	6.9607e-30
c68618_g2	3.883	9.2717e-07	8.7056e-05
c137886_g1	3.8849	8.0484e-05	0.0046473
c92849_g1	3.8909	5.8593e-07	5.7408e-05
c118025_g1	3.9013	1.1529e-41	5.4928e-38
c114473_g1	3.9081	4.6169e-09	6.6948e-07
c69790_g1	3.9098	1.6134e-15	5.9393e-13
c112781_g1	3.9151	9.7739e-13	2.5309e-10
c27688_g1	3.916	4.5338e-06	0.00036088
c109973_g1	3.9222	7.1825e-09	1.0082e-06
c105095_g2	3.9274	4.0664e-05	0.0025531
c121105_g1	3.9283	1.6844e-11	3.6336e-09
c56902_g2	3.9355	1.6006e-05	0.0011093
c124890_g1	3.9435	2.0975e-07	2.2683e-05
c104925_g1	3.9446	2.1719e-14	7.0463e-12
c75894_g1	3.964	1.0802e-11	2.4145e-09
c124199_g1	3.9642	2.3297e-11	4.9114e-09
c119490_g2	3.9665	4.5591e-29	9.5033e-26
c86746_g1	3.9678	0.001275	0.046955
c101615_g1	3.9727	1.9742e-08	2.5841e-06
c65550_g1	3.9746	0.0010076	0.03883
c96107_g1	3.976	3.7907e-06	0.0003079
c109200_g1	3.9772	3.2907e-12	7.8956e-10
c75542_g1	3.9815	5.0788e-23	4.8674e-20
c110412_g2	3.9845	0.00071629	0.029212
c259796_g1	3.988	2.3273e-06	0.00019882
c117657_g1	3.9937	1.2086e-08	1.628e-06
c92900_g4	3.9948	0.00019089	0.0097131
c124521_g1	3.9989	1.1243e-13	3.3661e-11
c38045_g1	3.9996	1.2427e-09	1.9755e-07
c106810_g1	4.0093	9.8891e-06	0.00072106
c61747_g1	4.01	0.00079041	0.031699
c108679_g1	4.0141	0.00092609	0.036175
c115454_g1	4.0156	8.487e-08	9.8079e-06
c120758_g1	4.0297	1.5654e-47	9.668e-44
c125462_g7	4.0345	4.9444e-16	1.9631e-13
c42127_g1	4.04	0.00091249	0.035761
c115130_g1	4.0494	1.7387e-20	1.1981e-17
c121672_g3	4.0538	9.6102e-15	3.2639e-12
c124676_g6	4.0562	1.5967e-06	0.00014141
c104307_g1	4.0669	5.2702e-10	8.9586e-08
c123337_g2	4.0687	0.00076933	0.03101
c212269_g1	4.0882	0.00066286	0.027381
c106866_g6	4.0947	5.1286e-22	4.3858e-19
c123378_g3	4.0989	0.0010436	0.039906
c81556_g1	4.1015	1.1048e-06	0.00010151
c36783_g1	4.107	0.00039461	0.01778
c114506_g3	4.1119	7.1336e-22	5.9183e-19
c107508_g1	4.1275	1.5147e-10	2.8285e-08
c124608_g1	4.1301	1.9868e-21	1.5702e-18
c118213_g2	4.1514	0.00098964	0.038299
c117527_g2	4.1519	6.1366e-27	1.0442e-23
c103158_g1	4.1543	9.4243e-15	3.2139e-12
c120758_g3	4.1551	1.8136e-16	7.637e-14
c110613_g1	4.1568	9.3451e-18	4.6798e-15
c86364_g1	4.1575	8.9085e-06	0.00065791
c115111_g2	4.162	4.5125e-10	7.8467e-08
c118296_g1	4.1717	3.2948e-22	2.8468e-19
c416_g1	4.1787	0.00027219	0.013035
c58752_g1	4.1887	2.4817e-06	0.0002105
c114451_g1	4.2056	1.9895e-17	9.3984e-15
c108165_g1	4.206	9.9704e-10	1.6126e-07
c121950_g1	4.2107	4.8944e-23	4.7178e-20
c84483_g1	4.213	0.00024945	0.01212
c108844_g1	4.2149	0.00032727	0.01521
c123185_g1	4.2166	1.0984e-14	3.7078e-12
c229105_g1	4.2245	2.8699e-08	3.6338e-06
c56034_g1	4.2347	2.4688e-07	2.6356e-05
c95096_g1	4.235	3.6815e-06	0.00030005
c118776_g2	4.2378	5.4356e-11	1.0947e-08
c125433_g1	4.2448	6.3813e-25	8.3135e-22
c106421_g1	4.2459	2.3658e-07	2.5338e-05
c112198_g4	4.2535	1.3515e-06	0.00012196
c118026_g3	4.2761	1.1849e-51	8.9814e-48
c125736_g1	4.2762	9.2011e-18	4.6355e-15
c50770_g1	4.2889	0.00024136	0.011803
c115843_g1	4.2901	6.5779e-29	1.3059e-25
c125137_g5	4.2934	3.6445e-07	3.7492e-05
c113838_g1	4.3007	3.1106e-07	3.2644e-05
c107605_g1	4.3032	1.8841e-08	2.4681e-06
c123110_g3	4.3202	1.8149e-07	1.9742e-05
c7068_g1	4.3321	1.6273e-07	1.7876e-05
c84752_g1	4.3336	3.6398e-11	7.5026e-09
c119833_g3	4.343	1.1752e-09	1.8824e-07
c100052_g1	4.3432	3.2878e-14	1.0443e-11
c104591_g1	4.3572	4.1253e-07	4.1948e-05
c163893_g1	4.3573	0.00015383	0.0080615
c109080_g3	4.3577	9.424e-05	0.005302
c225616_g1	4.3618	9.6651e-09	1.3211e-06
c102299_g1	4.3632	1.3684e-09	2.1608e-07
c115849_g4	4.3761	8.1154e-09	1.1231e-06
c124865_g1	4.12338	2.5359e-08	3.2479e-06
c113889_g2	4.4	7.7705e-07	7.4215e-05
c109892_g6	4.4014	0.0012453	0.046094
c72491_g3	4.4076	8.2209e-05	0.0047337
c88497_g1	4.4078	4.5256e-05	0.0028034
c52228_g2	4.412	6.161e-13	1.6544e-10
c25752_g1	4.416	1.4364e-06	0.00012871
c81229_g1	4.4223	1.6964e-14	5.6466e-12
c183612_g1	4.4281	6.3953e-05	0.0038129
c111480_g2	4.4304	6.7341e-13	1.7881e-10
c121626_g1	4.4414	4.0586e-43	2.0509e-39
c120933_g2	4.4429	3.8245e-05	0.0024164
c118463_g1	4.4465	2.1678e-07	2.3367e-05
c111862_g1	4.4565	1.3017e-13	3.8613e-11
c117382_g3	4.5069	1.1961e-05	0.00085458
c109567_g1	4.5475	2.558e-12	6.2638e-10
c201928_g1	4.5517	6.829e-12	1.5794e-09
c112342_g1	4.5563	2.4392e-21	1.9007e-18
c97975_g2	4.5587	2.2949e-05	0.0015301
c123117_g1	4.5906	7.3454e-17	3.2491e-14
c124543_g2	4.62	1.3679e-23	1.4716e-20
c123174_g7	4.6232	6.3802e-10	1.0597e-07
c114049_g1	4.6297	1.2098e-20	8.5484e-18
c107611_g1	4.6324	9.5657e-23	8.8129e-20
c101712_g1	4.6478	4.9905e-07	4.9624e-05
c95998_g2	4.6555	2.3234e-08	2.9987e-06
c119706_g2	4.6587	5.9599e-07	5.8324e-05
c111413_g1	4.6643	6.785e-38	2.5143e-34
c155807_g1	4.6705	1.1951e-15	4.4785e-13
c121626_g2	4.6882	9.6663e-06	0.00070698
c114752_g1	4.41591	4.2991e-58	4.7794e-54
c123603_g3	4.7059	7.5819e-09	1.0536e-06
c114546_g2	4.7301	2.3848e-15	8.5707e-13
c122106_g2	4.7385	0.00057566	0.024442
c111899_g2	4.7392	6.8842e-34	1.9793e-30
c56890_g1	4.7677	1.9262e-06	0.00016729
c120400_g1	4.7707	5.4823e-35	1.8657e-31
c117036_g1	4.7849	4.9896e-08	6.0293e-06
c126229_g1	4.7916	2.9125e-45	1.7346e-41
c122483_g4	4.7937	0.00092144	0.036036
c123462_g5	4.8009	0.00086672	0.034241
c107663_g1	4.8127	3.5616e-15	1.253e-12
c79285_g1	4.8188	0.00088544	0.034882
c77701_g1	4.8261	0.0011353	0.042764
c104371_g1	4.8272	1.6538e-08	2.1836e-06
c118639_g1	4.8334	0.00028816	0.013655
c184370_g1	4.8384	0.0011145	0.042218
c117429_g1	4.8475	8.7422e-29	1.7151e-25
c107147_g1	4.8565	1.3799e-12	3.5185e-10
c125759_g1	4.8613	3.0237e-16	1.2419e-13
c205191_g1	4.8934	2.3544e-08	3.0341e-06
c102734_g2	4.8948	6.4323e-09	9.1288e-07
c101904_g1	4.8976	7.3928e-11	1.4521e-08
c108691_g1	4.9211	6.9006e-20	4.4089e-17
c269690_g1	4.9238	0.0005475	0.023476
c83601_g3	4.9289	5.6089e-29	1.1406e-25
c89131_g1	4.93	2.3542e-05	0.0015659
c111853_g1	4.9364	6.2987e-07	6.1388e-05
c124300_g4	4.9548	1.8785e-07	2.0421e-05
c121125_g1	4.9564	2.902e-64	3.7226e-60
c115076_g2	4.9564	1.5015e-40	6.5891e-37
c8983_g1	4.9578	1.5099e-08	2.011e-06
c104090_g1	4.977	4.0325e-07	4.1129e-05
c47534_g1	4.9986	2.8323e-09	4.2359e-07
c112030_g1	5.0104	1.1586e-19	7.1559e-17
c124874_g4	5.0113	1.6934e-07	1.8492e-05
c100974_g1	5.0131	1.9859e-05	0.001344
c111381_g4	5.023	0.00022485	0.011139
c75978_g1	5.0268	0.0002249	0.011139
c107485_g1	5.0334	3.7902e-10	6.6531e-08
c116087_g1	5.0543	4.8411e-23	4.6935e-20
c12375_g1	5.0588	0.00021163	0.01061
c114365_g1	5.0607	1.9116e-20	1.3074e-17
c115662_g2	5.0802	1.6349e-11	3.5374e-09
c70808_g1	5.0849	0.00036405	0.016646
c126007_g4	5.1021	0.0010317	0.039594
c98252_g1	5.114	8.4131e-08	9.7291e-06
c113285_g1	5.1368	5.7301e-16	2.259e-13
c110846_g1	5.1437	6.6075e-19	3.7994e-16
c17067_g1	5.1441	6.4705e-05	0.0038517
c118006_g8	5.1607	2.6183e-16	1.0834e-13
c118502_g4	5.1672	1.2172e-05	0.00086741
c78049_g1	5.1746	4.3222e-08	5.2881e-06
c87393_g1	5.1747	3.0702e-06	0.00025459
c156698_g1	5.1922	0.00066554	0.027471
c120628_g2	5.2131	4.0989e-05	0.0025696
c89605_g1	5.221	4.8199e-23	4.6935e-20
c106959_g1	5.2309	2.2273e-08	2.8837e-06
c118169_g6	5.2602	7.5377e-09	1.0483e-06
c111973_g1	5.2765	4.0564e-09	5.944e-07
c120502_g2	5.3145	2.6512e-12	6.4731e-10
c102589_g1	5.3382	0.00016569	0.0086157
c9255_g1	5.3403	0.00011282	0.0061823
c114365_g3	5.3513	3.1107e-16	1.2683e-13
c185664_g1	5.3575	1.9218e-05	0.0013081
c98390_g1	5.3918	5.0578e-35	1.7571e-31
c105888_g1	5.4084	1.0051e-10	1.9288e-08
[truncated: 2,230 more rows]

## Sheet: Table S3
Table S2. Primers used for real-time quantitative PCR analyses.
Unigene ID	Annotation	Primer sequence (5′-3′)	Product length（ (bp)	E (%)	R2
c113956_g1	Anthocyanidin 3-O-glucosyltransfersae	CCCACAATGCGTCACAAA	117	96.409	0.995
		CAGTTGCCTCAAGGGTTTT
c51332_g1	Transcription factor R2R3-MYB	GAGGCAGGGTTACAGGTT	153	102.135	0.981
		TGGGAAATAGGTGGTCTT
c124316_g1	Dihydroflavonol 4-reductase	TCTCACAATCTCGTCCAT	127	90.327	0.995
		GATACCACGCCAAACAC
c123012_g2	Chalcone isomerase	CTGACTGGGCAACAATACTC	170	89.185	0.931
		GAAGGGGACTGGGTGAA
c124520_g1	Chalcon synthase	TCAGCATCCCAGACCAT	187	95.469	0.996
		GTGCGATCCAGAACAGG
c121630_g1	Flavanone 3-hydroxylase	GGTGCCTTTGTCGTCAATCT	309	92.572	0.995
		AACTTCGGTGGGCTTCTTC
c112398_g1	Actin	GCACCTGAAGAGCACCCT	145	91.464	0.998
		TGGCGTAAAGCGACAAAA
c122851_g2	Chalcon synthase	TGAGCGAGTACGGGAACA	188	92.155	0.973
		TCAGGCAGCAACTATGGG
c114453_g1	Chalcon synthase	AAGGACCTCGCTGAGAATAACC	183	93.344	0.984
		CGACCGCTCCACAGAAGTGT
c124520_g2	Chalcon synthase	GCATGTGCTGAGCGAATA	179	99.213	0.921
		GAAGGCTGTGAAGAACTACG
c113932_g1	Flavonoid 3′-hydroxylase	ACTGAAATCAAGGCGTTGTTAC	229	91.812	0.945
		ACGGATGGAGTCGGAAAGT
